# Supplementary material
Source: HighWire-hosted journal article supplement (https://bmjopen.bmj.com/content/9/2/e025218)
Supplement: inline-supplementary-material-1 [file inline-supplementary-material-1.pdf]

## Text S<sub>1</sub>: Quality assessment rules of included interventional studies.

Note: The minimum 20 items of WHO Trial Registration Data Set (TRDS, V.1.2.1) plus optional additional 3 items recommended by ICTRP, and some specific items for TCM information (including TCM intervention, diagnosis, outcome and rationale) were adopted to assess the reporting quality of registered interventional trials included in this study. Aim to better assessment, the total 23-item was divided into two parts: (1) simple items (i.e. item 1-12, 16-18, 22) and (2) complex items (i.e. item 13-15, 19-21, 23), which contained some subitems that needed to be evaluated individually.

### Part 1. Simple items

|   | Item/Label                                    | Assessment rules: “1” (reported) or “0” (not reported)                                                                                                                                                                                                                                                                                                                                                                                                                                                                                                                                                                                                                                                                                                                                                          |
|---|-----------------------------------------------|-----------------------------------------------------------------------------------------------------------------------------------------------------------------------------------------------------------------------------------------------------------------------------------------------------------------------------------------------------------------------------------------------------------------------------------------------------------------------------------------------------------------------------------------------------------------------------------------------------------------------------------------------------------------------------------------------------------------------------------------------------------------------------------------------------------------|
| 1 | Primary Registry and Trial Identifying Number | It should contain a <b>name of primary registry</b> and the <b>unique ID number</b> assigned by the Primary Registry to this trial.                                                                                                                                                                                                                                                                                                                                                                                                                                                                                                                                                                                                                                                                             |
| 2 | Date of Registration in Primary Registry      | A <b>clear date</b> when trial was officially registered in the Primary Registry.                                                                                                                                                                                                                                                                                                                                                                                                                                                                                                                                                                                                                                                                                                                               |
| 3 | Secondary Identifying Numbers                 | <p>These include: 1) The Universal Trial Number (UTN); 2) Identifiers assigned by the Sponsor (record Sponsor name and Sponsor-issued trial number (e.g., protocol number)); 3) Other trial registration numbers issued by other Registries (both Primary and Partner Registries in the WHO Registry Network, and other Registries); 4) Identifiers issued by funding bodies, collaborative research groups, regulatory authorities, ethics committees / institutional review boards, etc.</p> <p>All secondary identifiers will have 2 elements: an <b>identifier for the issuing authority</b> (eg CTN, ISRCTN, ACTRN) plus a <b>number</b>. There is no limit to the number of secondary identifiers that can be provided. Also, some trials do not have the secondary ID number, which recorded as “0”.</p> |
| 4 | Source(s) of Monetary or Material Support     | Major source(s) of monetary or material support for the trial (e.g., <b>funding agency, foundation, company, institution</b> ).                                                                                                                                                                                                                                                                                                                                                                                                                                                                                                                                                                                                                                                                                 |
| 5 | Primary Sponsor                               | It should contain the <b>individual, organization, group or other legal entity</b> which takes responsibility for initiating, managing and/or financing a study.                                                                                                                                                                                                                                                                                                                                                                                                                                                                                                                                                                                                                                                |
| 6 | Secondary Sponsor(s)                          | <b>Additional individuals, organizations or other legal persons</b> , if any, that have agreed with the Primary Sponsor to take on responsibilities of sponsorship. Also, some trials do not have this item, which recorded as “0”.                                                                                                                                                                                                                                                                                                                                                                                                                                                                                                                                                                             |
| 7 | Contact for public queries                    | Contact details should include the <b>name, email address, telephone number, affiliation and postal address</b> of the contact person. If all details or main details (i.e. name plus one contact information) were provided, the record was denoted                                                                                                                                                                                                                                                                                                                                                                                                                                                                                                                                                            |

|    |                                           |                                                                                                                                                                                                                                                                                                                                                                                                                                                                                                                                                                                                                                                                                                                    |
|----|-------------------------------------------|--------------------------------------------------------------------------------------------------------------------------------------------------------------------------------------------------------------------------------------------------------------------------------------------------------------------------------------------------------------------------------------------------------------------------------------------------------------------------------------------------------------------------------------------------------------------------------------------------------------------------------------------------------------------------------------------------------------------|
|    |                                           | to be “1”. However, if the valid contact information was missing or not reported, the record was denoted to be “0”.                                                                                                                                                                                                                                                                                                                                                                                                                                                                                                                                                                                                |
| 8  | Contact for scientific queries            | <p>Contact details of the Principal Investigator (PI) should include: i) <b>Name and title, email address, telephone number, postal address and affiliation of the PI</b>, and; ii) Email address, telephone number, postal address and affiliation of the contact for scientific queries about the trial (if applicable). The record was denoted to be “1” as some valid contact information were reported.</p> <p>If some registries had one field for two contact persons, the information of person(s) responsible for the overall scientific leadership (including the PI) was extracted from that field and classified as the scientific contact item, and the other one was recorded as public contact.</p> |
| 9  | Public title                              | Title intended for the lay public in easily understood language. An informative public <b>title</b> will describe the participants, the intervention, the comparator and the main outcome of the study. <b>Only absence in this item will denoted to be “0”.</b>                                                                                                                                                                                                                                                                                                                                                                                                                                                   |
| 10 | Scientific title                          | Scientific <b>title</b> of the study as it appears in the protocol submitted for funding and ethical review. Include trial acronym if available. It is desirable that the scientific title contain all elements of PICO (Participants, Intervention, Comparator and Outcomes). <b>Only absence in this item will denoted to be “0”.</b>                                                                                                                                                                                                                                                                                                                                                                            |
| 11 | Countries of Recruitment                  | It should contain the <b>name</b> of countries from which participants will be, are being, or have been recruited at the time of registration.                                                                                                                                                                                                                                                                                                                                                                                                                                                                                                                                                                     |
| 12 | Health condition(s) or problem(s) studied | <p>List the <b>name</b> of primary health condition(s) or problem(s) studied (e.g., depression, breast cancer, medication error).</p> <p>If the study is conducted in healthy human volunteers belonging to the target population of the intervention (e.g. preventive or screening interventions), enter the particular health condition(s) or problem(s) being prevented.</p>                                                                                                                                                                                                                                                                                                                                    |
| 16 | Date of first enrolment                   | Anticipated or actual <b>date of enrolment of the first participant</b> . Some Registries may use the label " <b>trial start date</b> ". If so, it should be made clear to Registrants (via ‘Help’ text or other documents) that this field must contain the date the first participant was enrolled. Specifically, if the date only contains the year and month, it also scored as “1”.                                                                                                                                                                                                                                                                                                                           |
| 17 | Target sample size                        | <b>Number</b> of participants that this trial plans to enroll in total.                                                                                                                                                                                                                                                                                                                                                                                                                                                                                                                                                                                                                                            |
| 18 | Recruitment status                        | Recruitment status include: <b>Pending, Recruiting, Suspended, Complete, etc.</b>                                                                                                                                                                                                                                                                                                                                                                                                                                                                                                                                                                                                                                  |
| 22 | Approvals                                 | This item includes ethics committees and regulatory authorities. For each approving entity the <b>name of the entity, the date and status of the approval should be reported.</b>                                                                                                                                                                                                                                                                                                                                                                                                                                                                                                                                  |

## Part 2. Complex items

Note: The following 7 complex items are important information for a trial, containing some subitems in each item according to the explanatory text in TRDS. Each subitem with detailed criteria need to be evaluated separately and the overall quality of each item was assessed comprehensively. Compared with WHO standard framework, different registries presented some variation in registration formats for some items. Take ClinicalTrials.gov for example, the field of 'detailed description' could not be ignored because it provided lots of additional information contributed to the assessment of intervention or study design item, although 'detailed description' was not specified in a particular item according to TRDS framework. Therefore, it was essential to **scan overall record information** in order to evaluate complex items objectively. Focus on the contents only with same name according to TRDS items is not enough.

Besides, according with the characteristics of TCM trials, some of key information related with TCM are specified in the data set, thus to assess whether these items are fully reported, including: 1) Details description of TCM intervention as a subitem included in item 13, 2) TCM diagnosis and its criteria as two subitems included in item 14, 3) TCM outcome(s) as a subitem included in item 19/20, 4) TCM background and rationale as an subitem included in item 21.

|    | Item/Label    | Assessment rules: "1" (reported) or "0" (not reported)                                                                                                                                                                                                                                                                                                                                                                                                                                                                                                                                                                                                                                                                                                                                                                                                                                                                                                                                                                                                                                                                                                                                                                                                                                                                                                                                                                                                                          |
|----|---------------|---------------------------------------------------------------------------------------------------------------------------------------------------------------------------------------------------------------------------------------------------------------------------------------------------------------------------------------------------------------------------------------------------------------------------------------------------------------------------------------------------------------------------------------------------------------------------------------------------------------------------------------------------------------------------------------------------------------------------------------------------------------------------------------------------------------------------------------------------------------------------------------------------------------------------------------------------------------------------------------------------------------------------------------------------------------------------------------------------------------------------------------------------------------------------------------------------------------------------------------------------------------------------------------------------------------------------------------------------------------------------------------------------------------------------------------------------------------------------------|
| 13 | Interventions | <p>This item contained <b>four subitems</b>:</p> <p><b>13.1 Intervention Name:</b> For drugs use generic name; for other types of interventions provide a brief descriptive name. For investigational new drugs that do not yet have a generic name, a chemical name, company code or serial number may be used on a temporary basis. As soon as the generic name has been established, update the associated registered records accordingly. For non-drug intervention types, provide an intervention name with sufficient detail so that it can be distinguished from other similar interventions.</p> <p>Name was assessed as reported ("1") if a specific TCM name was provided, such as Si-Ni-Tang/ Sini decoction (a Chinese Herbal Formula), Acupunctue of Point Hegu, etc. <b>No name or too generalized name was denoted as "0", such as Chinese medicine, TCM treatment, Drug group, etc.</b> These names of TCM interventions were too confused to figure out what specific technology adopted in a trial.</p> <p><b><u>13.2 TCM Intervention Description:</u> Must be sufficiently detailed</b> for it to be possible to distinguish between the arms of a study (e.g., comparison of different dosages of drug) and/or among similar interventions (e.g., comparison of multiple implantable cardiac defibrillators). For example, interventions involving drugs may include <b>dosage form, dosage, frequency and duration</b>. If the intervention is one or</p> |

|  |                                                                                                                                                                                                                                                                                                                                                                                                                                                                                                                                                                                                                                                                                                                                                                                                                                                                                                                                                                                                                                                                                                                                                                                                                                                                                                                                                                                                                                                                                                  |
|--|--------------------------------------------------------------------------------------------------------------------------------------------------------------------------------------------------------------------------------------------------------------------------------------------------------------------------------------------------------------------------------------------------------------------------------------------------------------------------------------------------------------------------------------------------------------------------------------------------------------------------------------------------------------------------------------------------------------------------------------------------------------------------------------------------------------------------------------------------------------------------------------------------------------------------------------------------------------------------------------------------------------------------------------------------------------------------------------------------------------------------------------------------------------------------------------------------------------------------------------------------------------------------------------------------------------------------------------------------------------------------------------------------------------------------------------------------------------------------------------------------|
|  | <p>more drugs, then use the International Non-Proprietary Name for each drug if possible (not brand/trade names). For an unregistered drug, the generic name, chemical name, or company serial number is acceptable.</p> <p>Given the considerable variability in the types of TCM interventions, the more detailed information should be provided. For example, the <b>ingredients</b> in compound formula, and the <b>operating methods</b> of acupuncture, cupping, or other non-pharmacy therapies should be reported.</p> <p><b>13.3 More Interventions:</b> If the intervention consists of several separate treatments, list them all in one line separated by commas (e.g., "low-fat diet, exercise"). Or use "and", etc. This point was assessed according to the <b>correct format</b> noted in TRDS, and was collected to understand the proportion of integrated traditional Chinese and conventional medicine.</p> <p><b>13.4 Controlled Intervention(s):</b> For controlled trials, the identity of the control arm should be clear. The control intervention(s) is/are the interventions against which the study intervention is evaluated (e.g., placebo, no treatment, active control). If an active control is used, be sure to enter in the <b>name(s) of that intervention or enter "placebo" or "no treatment" as applicable</b>. For each intervention, describe other intervention <b>details</b> as applicable (<b>dose, duration, mode of administration, etc</b>).</p> |
|--|--------------------------------------------------------------------------------------------------------------------------------------------------------------------------------------------------------------------------------------------------------------------------------------------------------------------------------------------------------------------------------------------------------------------------------------------------------------------------------------------------------------------------------------------------------------------------------------------------------------------------------------------------------------------------------------------------------------------------------------------------------------------------------------------------------------------------------------------------------------------------------------------------------------------------------------------------------------------------------------------------------------------------------------------------------------------------------------------------------------------------------------------------------------------------------------------------------------------------------------------------------------------------------------------------------------------------------------------------------------------------------------------------------------------------------------------------------------------------------------------------|

|    |                                      |                                                                                                                                                                                                                                                                                                                                                                                                                                                                                                                                                                                                                                                                                                                                                                                                                                                                                                                                                                                                                                                                                                                                                                                                                                                                                                                                                                                                                                                                                                                                                                                            |
|----|--------------------------------------|--------------------------------------------------------------------------------------------------------------------------------------------------------------------------------------------------------------------------------------------------------------------------------------------------------------------------------------------------------------------------------------------------------------------------------------------------------------------------------------------------------------------------------------------------------------------------------------------------------------------------------------------------------------------------------------------------------------------------------------------------------------------------------------------------------------------------------------------------------------------------------------------------------------------------------------------------------------------------------------------------------------------------------------------------------------------------------------------------------------------------------------------------------------------------------------------------------------------------------------------------------------------------------------------------------------------------------------------------------------------------------------------------------------------------------------------------------------------------------------------------------------------------------------------------------------------------------------------|
| 14 | Key Inclusion and Exclusion Criteria | <p>This item contained <b>six subitems</b>:</p> <p>14.1 <b>Age</b>: Clearly age range. Absence in this point was recorded as “0”.</p> <p>14.2 <b>Sex</b>: Male, Female or Both. Absence in this point was recorded as “0”.</p> <p>14.3 <b>Conventional medicine criteria</b> relate to <b>clinical diagnosis and co-morbid conditions</b>; <b>exclusion criteria</b> are often used to <b>ensure patient safety</b>.</p> <p>14.4 <b>Healthy volunteers</b>: If the study is conducted in healthy human volunteers <b>not belonging to the target population</b> (e.g., a preliminary safety study), enter "healthy human volunteer". If the trial included healthy volunteers, the record was denoted to be “1”. If not, the record was denoted to be “0”.</p> <p><b>14.5 Adopted TCM diagnosis</b>: include <b>name of TCM</b> disease(s) or “zheng”/ syndrome/pattern or symptom and sign, etc. The record was denoted to be “1” as the trial adopted TCM diagnosis and reported its name.</p> <p><b>14.6 TCM diagnosis with clearly criteria</b>: A clearly criteria should contain the <b>specific descriptions</b> (i.e. specific symptoms belonging to the pattern mentioned) <b>or guideline references</b>. If the diagnosis details were not provided, this information was denoted as “0”, although it had a name of TCM diagnosis. For example, the TCM diagnosis criteria reported as “TCM syndrome differentiation of depression” or “qi and blood stagnation pattern or cold and dampness stagnation pattern” without any specific descriptions or guideline references.</p> |
|----|--------------------------------------|--------------------------------------------------------------------------------------------------------------------------------------------------------------------------------------------------------------------------------------------------------------------------------------------------------------------------------------------------------------------------------------------------------------------------------------------------------------------------------------------------------------------------------------------------------------------------------------------------------------------------------------------------------------------------------------------------------------------------------------------------------------------------------------------------------------------------------------------------------------------------------------------------------------------------------------------------------------------------------------------------------------------------------------------------------------------------------------------------------------------------------------------------------------------------------------------------------------------------------------------------------------------------------------------------------------------------------------------------------------------------------------------------------------------------------------------------------------------------------------------------------------------------------------------------------------------------------------------|

|    |                          |                                                                                                                                                                                                                                                                                                                                                                                                                                                                                                                                                                                                                                                                                                                                                                                                                                                                                                                                                                                                                                                                                                                                                                                                                                                                                                                                      |
|----|--------------------------|--------------------------------------------------------------------------------------------------------------------------------------------------------------------------------------------------------------------------------------------------------------------------------------------------------------------------------------------------------------------------------------------------------------------------------------------------------------------------------------------------------------------------------------------------------------------------------------------------------------------------------------------------------------------------------------------------------------------------------------------------------------------------------------------------------------------------------------------------------------------------------------------------------------------------------------------------------------------------------------------------------------------------------------------------------------------------------------------------------------------------------------------------------------------------------------------------------------------------------------------------------------------------------------------------------------------------------------|
| 15 | Study type               | <p>This item contained <b>six subitems</b>:</p> <p>15.1 <b>Type of study</b>: Interventional or observational, etc.</p> <p>15.2 <b>Randomized/Non-randomized</b>: For randomized trials: the <b>randomize numbers/sequence generation</b> will be documented (i.e. the software, operator, etc). <b>The completely reported of randomized methods and correctly reported non-randomized methods were both considered as “1”. The missing records or incomplete reported of randomized were both considered as “0”.</b></p> <p>15.3 <b>Allocation concealment mechanism</b>: For randomized trials: the <b>detailed information</b> of allocation concealment should be clarified (i.e. central randomized/controlled, opaque envelope, etc).</p> <p>15.4 <b>Masking/Open label</b>: Masking (is masking used and, if so, who is masked). <b>The completely reported of masking methods and correctly reported open label were both considered as “1”. The missing records or incomplete reported of masking methods were both considered as “0”.</b> For example, if the trial reported masking was adopted but we did not find any information of who was blinded.</p> <p>15.5 <b>Assignment</b>: single arm, parallel, crossover or factorial, etc.</p> <p>15.6 <b>Phase</b>: if applicable. Presented as “1”; Absence as “0”.</p> |
| 19 | Primary Outcome(s)       | <p>This item contained <b>three subitems</b>:</p> <p>19.1 <b>Name</b>: The name of the outcome (do not use abbreviations).</p> <p>19.2 <b>Measurement</b>: The metric or method of measurement used (be as specific as possible).</p> <p>19.3 <b>Time point(s) of primary interest</b>: The time point is not the same as study duration or period of follow-up.</p> <p>Most trials should have only one primary outcome.</p>                                                                                                                                                                                                                                                                                                                                                                                                                                                                                                                                                                                                                                                                                                                                                                                                                                                                                                        |
| 20 | Key Secondary Outcome(s) | <p>This item contained <b>three subitems</b>:</p> <p>19.1 <b>Name</b>: The name of the outcome (do not use abbreviations).</p> <p>19.2 <b>Measurement</b>: The metric or method of measurement</p>                                                                                                                                                                                                                                                                                                                                                                                                                                                                                                                                                                                                                                                                                                                                                                                                                                                                                                                                                                                                                                                                                                                                   |

|    |                         |                                                                                                                                                                                                                                                                                                                                                                                                                                                                                                                                                                                                                                                                                                                                                                                                                                                                                                                                                                                                                                                                                                                                                           |
|----|-------------------------|-----------------------------------------------------------------------------------------------------------------------------------------------------------------------------------------------------------------------------------------------------------------------------------------------------------------------------------------------------------------------------------------------------------------------------------------------------------------------------------------------------------------------------------------------------------------------------------------------------------------------------------------------------------------------------------------------------------------------------------------------------------------------------------------------------------------------------------------------------------------------------------------------------------------------------------------------------------------------------------------------------------------------------------------------------------------------------------------------------------------------------------------------------------|
|    |                         | <p>used (be as specific as possible).</p> <p><b>19.3 Time point(s) of interest</b></p> <p>A secondary outcome may involve the same event, variable, or experience as the primary outcome, but measured at timepoints other than those of primary interest. Some trials may not have secondary outcome.</p>                                                                                                                                                                                                                                                                                                                                                                                                                                                                                                                                                                                                                                                                                                                                                                                                                                                |
|    | <b>19/20 Outcome(s)</b> | <p>Two subitems were included in the part of outcome(s):</p> <p><b><u>19/20.1 TCM related outcome(s):</u></b> In primary or secondary outcome(s), if TCM related outcome(s), such as “zheng”/symptom scoring, etc., was adopted in the trial, it would be considered as “1”.</p> <p><b>19/20.2 Adverse events outcome(s):</b> In primary or secondary outcome(s), if any adverse events outcome(s) was reported in the trial, it would be considered as “1”.</p>                                                                                                                                                                                                                                                                                                                                                                                                                                                                                                                                                                                                                                                                                          |
| 21 | Lay Summary / Synopsis  | <p>This item contained <b>three subitems</b>:</p> <p><b>21.1 Objective:</b> short description of the primary purpose of the study.</p> <p><b><u>21.2 Study hypothesis/background with TCM theory:</u></b> a brief statement of the study hypothesis or short description of the background of the study. This should be written in language intended to be read and understood by the lay public. For better understanding the rationale of a TCM clinical trial, the rational/background of TCM interventions should be clarified and provided as much as possible based on TCM theory. <b>In this part, a description with TCM theories in background of disease or intervention studied, was denoted to be “1”.</b> However, the assessment criteria in this subitem was according to whether it included TCM related rational/background contents, no matter more or less would be given “1”.</p> <p><b>21.3 Description of PIO:</b> a description of the included participants, interventions to be tested and outcomes to be measured.</p> <p>Do not include the entire protocol; do not duplicate information recorded in other data elements.</p> |
| 23 | Results links           | <p>Citations to any publications (including results) related to the trial, if available. Provide either the unique citation database identifier of an article (e.g., Pubmed or Embase), the Digital Object Identifier (DOI) or enter the full bibliographic citation.</p> <p>Links to (abstracts of) articles, conference proceedings, results</p>                                                                                                                                                                                                                                                                                                                                                                                                                                                                                                                                                                                                                                                                                                                                                                                                        |

|  |  |                                                                                                                                                                                                                                                                                                                                                                               |
|--|--|-------------------------------------------------------------------------------------------------------------------------------------------------------------------------------------------------------------------------------------------------------------------------------------------------------------------------------------------------------------------------------|
|  |  | <p>databases, registry results sections, trial websites with results and other links to results can also be provided here.</p> <p><b>Only available publication website/link was presented as “1”.</b><br/><b>Following situations were denoted to be “0”:</b> No field of results or absence in this item or results/publication unavailable/ cannot be downloaded, etc.</p> |
|--|--|-------------------------------------------------------------------------------------------------------------------------------------------------------------------------------------------------------------------------------------------------------------------------------------------------------------------------------------------------------------------------------|



**Text S<sub>2</sub>: Main ID of all included registration records.**

ChiCTR (1480)

|                      |                      |                      |                      |
|----------------------|----------------------|----------------------|----------------------|
| ChiCTR-DCD-15007073  | ChiCTR-EOC-15007674  | ChiCTR-ICC-15006335  | ChiCTR-ICR-15005795  |
| ChiCTR-ICR-15005823  | ChiCTR-ICR-15006004  | ChiCTR-ICR-15006138  | ChiCTR-ICR-15006315  |
| ChiCTR-ICR-15006657  | ChiCTR-ICR-15006787  | ChiCTR-ICR-15006850  | ChiCTR-IIR-15007567  |
| ChiCTR-CCH-13003487  | ChiCTR-CCH-13003756  | ChiCTR-INR-15007417  | ChiCTR-INR-15007502  |
| ChiCTR-CNC-12002214  | ChiCTR-INR-15007539  | ChiCTR-IOR-14005387  | ChiCTR-IOR-14005542  |
| ChiCTR-ECS-13003786  | ChiCTR-IOR-14005609  | ChiCTR-IOR-14005645  | ChiCTR-EOC-15007621  |
| ChiCTR-IOR-14005744  | ChiCTR-ICR-15006257  | ChiCTR-ICR-15006359  | ChiCTR-IOR-15006313  |
| ChiCTR-ICR-15006373  | ChiCTR-ICR-15006639  | ChiCTR-IOR-15006876  | ChiCTR-ICR-15006988  |
| ChiCTR-IOR-15007061  | ChiCTR-ICR-15007004  | ChiCTR-IOR-15007206  | ChiCTR-IDR-15007540  |
| ChiCTR-IOR-15007240  | ChiCTR-IOR-15007309  | ChiCTR-IOR-15007471  | ChiCTR-IOR-15007551  |
| ChiCTR-IIR-15007492  | ChiCTR-IIR-15007683  | ChiCTR-IPR-14005340  | ChiCTR-IPR-14005341  |
| ChiCTR-IPR-14005381  | ChiCTR-IOC-15006309  | ChiCTR-IOR-14005408  | ChiCTR-IOR-14005679  |
| ChiCTR-IOR-15005902  | ChiCTR-IOR-15006144  | ChiCTR-IPR-14005429  | ChiCTR-IOR-15006149  |
| ChiCTR-IPR-14005441  | ChiCTR-IPR-14005665  | ChiCTR-IPR-15005899  | ChiCTR-IPR-15006694  |
| ChiCTR-IPR-15006758  | ChiCTR-IPR-15006759  | ChiCTR-IPR-15006945  | ChiCTR-IPR-15007208  |
| ChiCTR-IOR-15006402  | ChiCTR-IPR-15007396  | ChiCTR-IOR-15006418  | ChiCTR-IPR-15007457  |
| ChiCTR-IPR-15007643  | ChiCTR-IOR-15006419  | ChiCTR-IOR-15006626  | ChiCTR-IOR-15006706  |
| ChiCTR-OCC-12002329  | ChiCTR-IOR-15006768  | ChiCTR-OCH-11001546  | ChiCTR-IOR-15006812  |
| ChiCTR-OCH-12003138  | ChiCTR-IOR-15006973  | ChiCTR-OCH-13003043  | ChiCTR-OCH-13004245  |
| ChiCTR-OCH-14004683  | ChiCTR-IOR-15007366  | ChiCTR-OCH-14004724  | ChiCTR-OCH-14005137  |
| ChiCTR-IOR-15007447  | ChiCTR-IOR-15007526  | ChiCTR-ONC-12002075  | ChiCTR-ONC-12002278  |
| ChiCTR-IOR-15007545  | ChiCTR-ONC-13003230  | ChiCTR-IOR-15007672  | ChiCTR-ONC-13003247  |
| ChiCTR-ONC-13003662  | ChiCTR-IOR-16007719  | ChiCTR-ONRC-08000260 | ChiCTR-ONRC-09000511 |
| ChiCTR-ONRC-10001073 | ChiCTR-ONRC-14004407 | ChiCTR-ONRC-14004483 | ChiCTR-OOB-15007079  |
| ChiCTR-OOC-14005398  | ChiCTR-OOC-14005431  | ChiCTR-IPR-14005269  | ChiCTR-IPR-14005281  |
| ChiCTR-OOC-15006835  | ChiCTR-IPR-14005282  | ChiCTR-IPR-14005357  | ChiCTR-IPR-14005358  |
| ChiCTR-IPR-14005361  | ChiCTR-OOQ-15007403  | ChiCTR-IPR-14005594  | ChiCTR-OPC-15005873  |
| ChiCTR-OPC-15006702  | ChiCTR-OPN-15005900  | ChiCTR-IPR-15005758  | ChiCTR-OPN-15006554  |
| ChiCTR-IPR-15005760  | ChiCTR-PRC-13003684  | ChiCTR-RCC-13003660  | ChiCTR-RCH-13003555  |
| ChiCTR-RCS-13003804  | ChiCTR-IPR-15006020  | ChiCTR-IPR-15006342  | ChiCTR-RPC-15006290  |
| ChiCTR-IPR-15006503  | ChiCTR-IPR-15006605  | ChiCTR-IPR-15006793  | ChiCTR-TCC-09000516  |
| ChiCTR-IPR-15007072  | ChiCTR-IPR-15007127  | ChiCTR-TCC-12002824  | ChiCTR-IPR-15007199  |
| ChiCTR-TNC-10001104  | ChiCTR-IPR-15007226  | ChiCTR-TNRC-07000035 | ChiCTR-IPR-15007368  |
| ChiCTR-TNRC-09000517 | ChiCTR-IPR-15007376  | ChiCTR-TNRC-10000883 | ChiCTR-TRC-05000734  |
| ChiCTR-OCB-15006981  | ChiCTR-TRC-07000010  | ChiCTR-OCC-12002013  | ChiCTR-TRC-07000033  |
| ChiCTR-OCH-10000780  | ChiCTR-TRC-07000047  | ChiCTR-TRC-08000048  | ChiCTR-TRC-08000069  |
| ChiCTR-OCH-14004799  | ChiCTR-TRC-08000083  | ChiCTR-OCS-14004354  | ChiCTR-TRC-08000098  |
| ChiCTR-OCS-14004355  | ChiCTR-TRC-08000138  | ChiCTR-OCS-14004487  | ChiCTR-TRC-08000139  |
| ChiCTR-TRC-08000156  | ChiCTR-ONC-11001624  | ChiCTR-ONC-12002009  | ChiCTR-TRC-08000169  |
| ChiCTR-TRC-08000209  | ChiCTR-ONC-13003714  | ChiCTR-TRC-08000261  | ChiCTR-ONC-13003787  |
| ChiCTR-TRC-08000283  | ChiCTR-ONC-14004937  | ChiCTR-TRC-08000330  | ChiCTR-ONRC-10001069 |

|                      |                      |                      |                      |
|----------------------|----------------------|----------------------|----------------------|
| ChiCTR-TRC-09000468  | ChiCTR-ONRC-11001311 | ChiCTR-TRC-09000507  | ChiCTR-ONRC-11001660 |
| ChiCTR-TRC-09000527  | ChiCTR-TRC-09000528  | ChiCTR-ONRC-12002087 | ChiCTR-ONRC-12002552 |
| ChiCTR-TRC-09000565  | ChiCTR-ONRC-12002792 | ChiCTR-TRC-09000651  | ChiCTR-TRC-10000770  |
| ChiCTR-ONRC-13003932 | ChiCTR-ONRC-14004823 | ChiCTR-TRC-10000843  | ChiCTR-OO-13003389   |
| ChiCTR-TRC-10000889  | ChiCTR-OOB-15006589  | ChiCTR-TRC-10000956  | ChiCTR-OOB-15006900  |
| ChiCTR-OOC-14005440  | ChiCTR-TRC-10000957  | ChiCTR-OOC-15006157  | ChiCTR-OOC-15006599  |
| ChiCTR-TRC-10000963  | ChiCTR-TRC-10001004  | ChiCTR-TRC-10001155  | ChiCTR-TRC-11001175  |
| ChiCTR-TRC-11001255  | ChiCTR-OPB-15007097  | ChiCTR-TRC-11001256  | ChiCTR-TRC-11001257  |
| ChiCTR-TRC-11001262  | ChiCTR-OQR-14004879  | ChiCTR-TRC-11001263  | ChiCTR-TRC-11001375  |
| ChiCTR-POR-15007274  | ChiCTR-TRC-11001406  | ChiCTR-PRC-06000002  | ChiCTR-TRC-11001409  |
| ChiCTR-PRC-07000013  | ChiCTR-TRC-11001410  | ChiCTR-TRC-11001633  | ChiCTR-TRC-11001659  |
| ChiCTR-TRC-11001816  | ChiCTR-TCH-11001547  | ChiCTR-TRC-11003028  | ChiCTR-TCS-11001624  |
| ChiCTR-TRC-12001933  | ChiCTR-TRC-00000481  | ChiCTR-TRC-12002062  | ChiCTR-TRC-07000023  |
| ChiCTR-TRC-12002150  | ChiCTR-TRC-08000088  | ChiCTR-TRC-08000130  | ChiCTR-TRC-12002191  |
| ChiCTR-TRC-08000204  | ChiCTR-TRC-12002272  | ChiCTR-TRC-08000255  | ChiCTR-TRC-12002362  |
| ChiCTR-TRC-08000257  | ChiCTR-COC-15007361  | ChiCTR-TRC-08000278  | ChiCTR-TRC-12002427  |
| ChiCTR-TRC-09000389  | ChiCTR-TRC-09000519  | ChiCTR-TRC-09000549  | ChiCTR-TRC-12002529  |
| ChiCTR-TRC-09000594  | ChiCTR-TRC-12002679  | ChiCTR-TRC-09000600  | ChiCTR-TRC-09000601  |
| ChiCTR-TRC-12002718  | ChiCTR-TRC-10000947  | ChiCTR-TRC-12002745  | ChiCTR-CPC-14005311  |
| ChiCTR-TRC-10000950  | ChiCTR-TRC-10001017  | ChiCTR-TRC-10001074  | ChiCTR-TRC-12002961  |
| ChiCTR-TRC-10001146  | ChiCTR-TRC-10001518  | ChiCTR-TRC-12002962  | ChiCTR-TRC-11001212  |
| ChiCTR-TRC-12002971  | ChiCTR-TRC-11001226  | ChiCTR-DNRC-13003367 | ChiCTR-TRC-11001274  |
| ChiCTR-TRC-12003062  | ChiCTR-ECH-13003832  | ChiCTR-TRC-11001297  | ChiCTR-TRC-12003174  |
| ChiCTR-ECS-11001728  | ChiCTR-TRC-11001347  | ChiCTR-TRC-12003871  | ChiCTR-TRC-11001352  |
| ChiCTR-TRC-13003026  | ChiCTR-TRC-11001365  | ChiCTR-TRC-11001379  | ChiCTR-TRC-13003086  |
| ChiCTR-TRC-11001382  | ChiCTR-TRC-11001460  | ChiCTR-TRC-11001554  | ChiCTR-TRC-13003165  |
| ChiCTR-TRC-11001719  | ChiCTR-TRC-11001727  | ChiCTR-TRC-11001755  | ChiCTR-TRC-13003239  |
| ChiCTR-TRC-11001813  | ChiCTR-TRC-13003241  | ChiCTR-TRC-13003253  | ChiCTR-TRC-11001839  |
| ChiCTR-TRC-11001863  | ChiCTR-TRC-13003303  | ChiCTR-TRC-11002409  | ChiCTR-TRC-13003304  |
| ChiCTR-TRC-13003324  | ChiCTR-TRC-12001928  | ChiCTR-ECS-12002456  | ChiCTR-TRC-12001929  |
| ChiCTR-TRC-13003326  | ChiCTR-TRC-12001935  | ChiCTR-TRC-13003353  | ChiCTR-TRC-12001975  |
| ChiCTR-TRC-13003418  | ChiCTR-TRC-12002003  | ChiCTR-TRC-13003431  | ChiCTR-TRC-12002228  |
| ChiCTR-TRC-13003434  | ChiCTR-TRC-13003448  | ChiCTR-TRC-13003531  | ChiCTR-TRC-12002367  |
| ChiCTR-TRC-13003533  | ChiCTR-TRC-12002402  | ChiCTR-TRC-13003552  | ChiCTR-TRC-13003581  |
| ChiCTR-TRC-12002445  | ChiCTR-TRC-13003600  | ChiCTR-TRC-13003602  | ChiCTR-ECS-13003795  |
| ChiCTR-TRC-13003603  | ChiCTR-TRC-12002560  | ChiCTR-ICR-15006021  | ChiCTR-TRC-13003604  |
| ChiCTR-TRC-12002582  | ChiCTR-TRC-13003605  | ChiCTR-TRC-12002621  | ChiCTR-TRC-13003606  |
| ChiCTR-TRC-12002668  | ChiCTR-TRC-13003635  | ChiCTR-TRC-13003637  | ChiCTR-ICR-15006622  |
| ChiCTR-TRC-12002694  | ChiCTR-TRC-13003641  | ChiCTR-TRC-12002695  | ChiCTR-TRC-13003668  |
| ChiCTR-TRC-12002762  | ChiCTR-TRC-13003698  | ChiCTR-ICR-15006640  | ChiCTR-TRC-12002765  |
| ChiCTR-TRC-13003707  | ChiCTR-TRC-12002797  | ChiCTR-TRC-13003742  | ChiCTR-TRC-13003031  |
| ChiCTR-TRC-13003803  | ChiCTR-TRC-13003888  | ChiCTR-TRC-13003916  | ChiCTR-TRC-13003144  |
| ChiCTR-TRC-13003145  | ChiCTR-TRC-13003919  | ChiCTR-TRC-13003193  | ChiCTR-TRC-13003959  |
| ChiCTR-TRC-13003969  | ChiCTR-TRC-13003233  | ChiCTR-TRC-13003266  | ChiCTR-TRC-13004029  |
| ChiCTR-TRC-13004048  | ChiCTR-TRC-13003461  | ChiCTR-TRC-13004049  | ChiCTR-TRC-13003519  |

|                      |                       |                       |                      |
|----------------------|-----------------------|-----------------------|----------------------|
| ChiCTR-TRC-13003548  | ChiCTR-ICR-15006653   | ChiCTR-TRC-13004125   | ChiCTR-TRC-13003594  |
| ChiCTR-TRC-13004412  | ChiCTR-TRC-13003671   | ChiCTR-TRC-13004564   | ChiCTR-TRC-13003713  |
| ChiCTR-TRC-13003716  | ChiCTR-TRC-14004180   | ChiCTR-TRC-14004181   | ChiCTR-TRC-13003717  |
| ChiCTR-TRC-14004182  | ChiCTR-TRC-13003780   | ChiCTR-TRC-14004235   | ChiCTR-TRC-14004293  |
| ChiCTR-IIR-15007620  | ChiCTR-TRC-13003793   | ChiCTR-TRC-14004327   | ChiCTR-TRC-13003836  |
| ChiCTR-TRC-13003911  | ChiCTR-TRC-14004403   | ChiCTR-TRC-13003931   | ChiCTR-TRC-14004460  |
| ChiCTR-TRC-13003936  | ChiCTR-TRC-13004010   | ChiCTR-TRC-14004613   | ChiCTR-TRC-13004038  |
| ChiCTR-TRC-13004040  | ChiCTR-TRC-14004739   | ChiCTR-TRC-13004072   | ChiCTR-TRC-14004899  |
| ChiCTR-TRC-13004418  | ChiCTR-TRC-14004917   | ChiCTR-TRC-14004149   | ChiCTR-TRC-14004153  |
| ChiCTR-TRC-14004940  | ChiCTR-TRC-14004995   | ChiCTR-TRC-14004171   | ChiCTR-TRC-14005000  |
| ChiCTR-TRC-14004172  | ChiCTR-TRC-14005098   | ChiCTR-TRC-14005099   | ChiCTR-TRC-14004215  |
| ChiCTR-TRC-14005182  | ChiCTR-TRC-14004244   | ChiCTR-TRC-14004435   | ChiCTR-TRC-14005185  |
| ChiCTR-TRC-14004469  | ChiCTR-TRC-14005194   | ChiCTR-TRC-14004504   | ChiCTR-TRC-14004546  |
| ChiCTR-TRC-14005228  | ChiCTR-TRC-14004627   | ChiCTR-TRC-14004672   | ChiCTR-TRC-14004720  |
| ChiCTR-TRC-14004758  | ChiCTR-INR-15007413   | ChiCTR-TRC-14004838   | ChiCTR-INR-15007491  |
| ChiCTR-TRC-14004842  | ChiCTR-TRC-14004872   | ChiCTR-TRC-14004963   | ChiCTR-TRC-14005135  |
| ChiCTR-TRC-14005192  | ChiCTR-TTRCC-12002359 | ChiCTR-TTRCC-14004406 | ChiCTR-IOC-14005385  |
| ChiCTR-IOC-15006913  | ChiCTR-IOR-14005249   | ChiCTR-IOR-14005377   | ChiCTR-IOR-14005384  |
| ChiCTR-IOR-14005397  | ChiCTR-IOR-14005404   | ChiCTR-IOR-14005474   | ChiCTR-IOR-14005494  |
| ChiCTR-IOR-14005510  | ChiCTR-IOR-14005519   | ChiCTR-IOR-14005608   | ChiCTR-IOR-14005644  |
| ChiCTR-IOR-14005664  | ChiCTR-IOR-14005674   | ChiCTR-IOR-14005688   | ChiCTR-IOR-14005700  |
| ChiCTR-IOR-14005737  | ChiCTR-IOR-15005797   | ChiCTR-IOR-15005987   | ChiCTR-IOR-15006102  |
| ChiCTR-IOR-15006259  | ChiCTR-IOR-15006357   | ChiCTR-IOR-15006390   | ChiCTR-IOR-15006515  |
| ChiCTR-IOR-15006523  | ChiCTR-IOR-15006733   | ChiCTR-IOR-15006886   | ChiCTR-IOR-15007136  |
| ChiCTR-IOR-15007299  | ChiCTR-IOR-15007349   | ChiCTR-IPC-15006889   | ChiCTR-IPC-15007019  |
| ChiCTR-IPC-15007276  | ChiCTR-IPR-14005427   | ChiCTR-IPR-15005945   | ChiCTR-IPR-15006047  |
| ChiCTR-IPR-15006190  | ChiCTR-IPR-15006194   | ChiCTR-IPR-15006308   | ChiCTR-IPR-15006484  |
| ChiCTR-IPR-15006501  | ChiCTR-IPR-15006621   | ChiCTR-IPR-15006711   | ChiCTR-IPR-15006879  |
| ChiCTR-IPR-15007068  | ChiCTR-IPR-15007222   | ChiCTR-OCC-12002880   | ChiCTR-OCC-14004550  |
| ChiCTR-OCC-14004850  | ChiCTR-OCC-15006374   | ChiCTR-OCH-09000520   | ChiCTR-OCH-13003887  |
| ChiCTR-OCH-13003921  | ChiCTR-OCN-15006356   | ChiCTR-OCS-13003561   | ChiCTR-OCS-13003640  |
| ChiCTR-ONC-08000715  | ChiCTR-ONC-11001358   | ChiCTR-ONC-12002279   | ChiCTR-ONC-12002482  |
| ChiCTR-ONC-13004007  | ChiCTR-ONC-15007633   | ChiCTR-ONRC-09000509  | ChiCTR-ONRC-13003670 |
| ChiCTR-OO-12002549   | ChiCTR-OO-13003478    | ChiCTR-OOC-14005389   | ChiCTR-OOC-14005430  |
| ChiCTR-OOC-15005858  | ChiCTR-OOC-15006297   | ChiCTR-OOC-15006392   | ChiCTR-OOC-15006445  |
| ChiCTR-OOC-15006765  | ChiCTR-OOC-15006824   | ChiCTR-OOC-15006830   | ChiCTR-OPC-15007030  |
| ChiCTR-OPC-15007336  | ChiCTR-OPN-15006990   | ChiCTR-OPN-15007528   | ChiCTR-ORC-08000305  |
| ChiCTR-ORC-09000505  | ChiCTR-PRC-11001511   | ChiCTR-PRC-12002564   | ChiCTR-RCS-13004001  |
| ChiCTR-RNRC-13003847 | ChiCTR-RTRCC-12002675 | ChiCTR-TNC-11001366   | ChiCTR-TNRC-09000511 |
| ChiCTR-TNRC-10001073 | ChiCTR-TRC-05000622   | ChiCTR-TRC-07000024   | ChiCTR-TRC-07000036  |
| ChiCTR-TRC-08000176  | ChiCTR-TRC-08000184   | ChiCTR-TRC-08000276   | ChiCTR-TRC-08000297  |
| ChiCTR-TRC-09000352  | ChiCTR-TRC-09000390   | ChiCTR-TRC-09000455   | ChiCTR-TRC-09000471  |
| ChiCTR-TRC-09000604  | ChiCTR-TRC-09000668   | ChiCTR-TRC-10000771   | ChiCTR-TRC-10000791  |
| ChiCTR-TRC-10000807  | ChiCTR-TRC-10000836   | ChiCTR-TRC-10000887   | ChiCTR-TRC-10001016  |
| ChiCTR-TRC-10001086  | ChiCTR-TRC-10001360   | ChiCTR-TRC-10001609   | ChiCTR-TRC-11001169  |

|                       |                      |                      |                       |
|-----------------------|----------------------|----------------------|-----------------------|
| ChiCTR-TRC-11001242   | ChiCTR-TRC-11001252  | ChiCTR-TRC-11001254  | ChiCTR-TRC-11001261   |
| ChiCTR-TRC-11001310   | ChiCTR-TRC-11001343  | ChiCTR-TRC-11001349  | ChiCTR-TRC-11001353   |
| ChiCTR-TRC-11001388   | ChiCTR-TRC-11001401  | ChiCTR-TRC-11001408  | ChiCTR-TRC-11001600   |
| ChiCTR-TRC-11001693   | ChiCTR-TRC-11001712  | ChiCTR-TRC-11001777  | ChiCTR-TRC-12001971   |
| ChiCTR-TRC-12002152   | ChiCTR-TRC-12002206  | ChiCTR-TRC-12002245  | ChiCTR-TRC-12002320   |
| ChiCTR-TRC-12002330   | ChiCTR-TRC-12002355  | ChiCTR-TRC-12002447  | ChiCTR-TRC-12002524   |
| ChiCTR-TRC-12002538   | ChiCTR-TRC-12002539  | ChiCTR-TRC-12002684  | ChiCTR-TRC-12002904   |
| ChiCTR-TRC-12002920   | ChiCTR-TRC-12003063  | ChiCTR-TRC-12003168  | ChiCTR-TRC-12003825   |
| ChiCTR-TRC-12003870   | ChiCTR-TRC-12004849  | ChiCTR-TRC-13003000  | ChiCTR-TRC-13003027   |
| ChiCTR-TRC-13003085   | ChiCTR-TRC-13003203  | ChiCTR-TRC-13003300  | ChiCTR-TRC-13003317   |
| ChiCTR-TRC-13003322   | ChiCTR-TRC-13003323  | ChiCTR-TRC-13003329  | ChiCTR-TRC-13003572   |
| ChiCTR-TRC-13003587   | ChiCTR-TRC-13003595  | ChiCTR-TRC-13003601  | ChiCTR-TRC-13003621   |
| ChiCTR-TRC-13003665   | ChiCTR-TRC-13003703  | ChiCTR-TRC-13003704  | ChiCTR-TRC-13003894   |
| ChiCTR-TRC-13003985   | ChiCTR-TRC-13004012  | ChiCTR-TRC-13004045  | ChiCTR-TRC-13004051   |
| ChiCTR-TRC-13004085   | ChiCTR-TRC-13004122  | ChiCTR-TRC-13004553  | ChiCTR-TRC-14004105   |
| ChiCTR-TRC-14004156   | ChiCTR-TRC-14004179  | ChiCTR-TRC-14004232  | ChiCTR-TRC-14004433   |
| ChiCTR-TRC-14004494   | ChiCTR-TRC-14004515  | ChiCTR-TRC-14004523  | ChiCTR-TRC-14004543   |
| ChiCTR-TRC-14004555   | ChiCTR-TRC-14004699  | ChiCTR-TRC-14004727  | ChiCTR-TRC-14004859   |
| ChiCTR-TRC-14004916   | ChiCTR-TRC-14004932  | ChiCTR-TRC-14005143  | ChiCTR-TTRCC-13003135 |
| ChiCTR-TTRCC-13003732 | ChiCTR-CCH-13003770  | ChiCTR-COC-15007342  | ChiCTR-CPC-15006921   |
| ChiCTR-DCC-10000759   | ChiCTR-EOB-15006625  | ChiCTR-ICC-15007244  | ChiCTR-ICR-14005703   |
| ChiCTR-ICR-15005877   | ChiCTR-ICR-15005935  | ChiCTR-ICR-15006197  | ChiCTR-ICR-15006455   |
| ChiCTR-ICR-15006623   | ChiCTR-ICR-15006676  | ChiCTR-ICR-15006783  | ChiCTR-INR-15007378   |
| ChiCTR-INR-15007649   | ChiCTR-IOC-14005639  | ChiCTR-IOR-14005372  | ChiCTR-IOR-14005693   |
| ChiCTR-IOR-14005750   | ChiCTR-IOR-15005814  | ChiCTR-IOR-15005960  | ChiCTR-IOR-15005985   |
| ChiCTR-IOR-15006548   | ChiCTR-IOR-15006648  | ChiCTR-IOR-15006884  | ChiCTR-IOR-15007062   |
| ChiCTR-IOR-15007194   | ChiCTR-IOR-15007346  | ChiCTR-IOR-15007418  | ChiCTR-IOR-15007495   |
| ChiCTR-IOR-15007542   | ChiCTR-IOR-15007615  | ChiCTR-IOR-15007673  | ChiCTR-IPC-15006295   |
| ChiCTR-IPC-15007109   | ChiCTR-IPR-14005331  | ChiCTR-IPR-14005383  | ChiCTR-IPR-14005610   |
| ChiCTR-IPR-14005655   | ChiCTR-IPR-14005730  | ChiCTR-IPR-15005905  | ChiCTR-IPR-15006131   |
| ChiCTR-IPR-15006191   | ChiCTR-IPR-15006344  | ChiCTR-IPR-15006578  | ChiCTR-IPR-15006624   |
| ChiCTR-IPR-15006630   | ChiCTR-IPR-15006778  | ChiCTR-IPR-15007383  | ChiCTR-OCB-15007330   |
| ChiCTR-OCH-09000335   | ChiCTR-OCH-10000815  | ChiCTR-OCH-10001104  | ChiCTR-OCH-12002317   |
| ChiCTR-OCH-13003261   | ChiCTR-OCH-14004615  | ChiCTR-OCS-11001594  | ChiCTR-OCS-12002007   |
| ChiCTR-OIR-15007512   | ChiCTR-ONC-09000382  | ChiCTR-ONC-12002390  | ChiCTR-ONC-15007547   |
| ChiCTR-ONRC-08000076  | ChiCTR-ONRC-08000277 | ChiCTR-ONRC-09000474 | ChiCTR-ONRC-10000753  |
| ChiCTR-ONRC-13003416  | ChiCTR-ONRC-13003523 | ChiCTR-ONRC-13004413 | ChiCTR-OO-12002554    |
| ChiCTR-OOB-15007629   | ChiCTR-OOC-14005401  | ChiCTR-OOC-15006831  | ChiCTR-OOC-15007064   |
| ChiCTR-OOC-16007710   | ChiCTR-ONN-15006680  | ChiCTR-OPC-15005880  | ChiCTR-OPC-15005918   |
| ChiCTR-OPC-15007031   | ChiCTR-OPN-15006552  | ChiCTR-RPC-14005489  | ChiCTR-TNRC-09000512  |
| ChiCTR-TRC-07000037   | ChiCTR-TRC-08000059  | ChiCTR-TRC-08000120  | ChiCTR-TRC-08000143   |
| ChiCTR-TRC-08000166   | ChiCTR-TRC-08000225  | ChiCTR-TRC-08000302  | ChiCTR-TRC-09000311   |
| ChiCTR-TRC-09000425   | ChiCTR-TRC-09000464  | ChiCTR-TRC-09000533  | ChiCTR-TRC-09000599   |
| ChiCTR-TRC-09000602   | ChiCTR-TRC-09000610  | ChiCTR-TRC-09000728  | ChiCTR-TRC-09003117   |
| ChiCTR-TRC-10000746   | ChiCTR-TRC-10000766  | ChiCTR-TRC-10000779  | ChiCTR-TRC-10000792   |

|                       |                       |                       |                       |
|-----------------------|-----------------------|-----------------------|-----------------------|
| ChiCTR-TRC-10000808   | ChiCTR-TRC-10000814   | ChiCTR-TRC-10000845   | ChiCTR-TRC-10000902   |
| ChiCTR-TRC-10001023   | ChiCTR-TRC-10001078   | ChiCTR-TRC-10001082   | ChiCTR-TRC-10001105   |
| ChiCTR-TRC-10001138   | ChiCTR-TRC-10001160   | ChiCTR-TRC-11001193   | ChiCTR-TRC-11001220   |
| ChiCTR-TRC-11001243   | ChiCTR-TRC-11001245   | ChiCTR-TRC-11001253   | ChiCTR-TRC-11001260   |
| ChiCTR-TRC-11001300   | ChiCTR-TRC-11001464   | ChiCTR-TRC-11001511   | ChiCTR-TRC-11001540   |
| ChiCTR-TRC-11001586   | ChiCTR-TRC-11001792   | ChiCTR-TRC-11001814   | ChiCTR-TRC-12001923   |
| ChiCTR-TRC-12001926   | ChiCTR-TRC-12001936   | ChiCTR-TRC-12001972   | ChiCTR-TRC-12001974   |
| ChiCTR-TRC-12002054   | ChiCTR-TRC-12002081   | ChiCTR-TRC-12002137   | ChiCTR-TRC-12002254   |
| ChiCTR-TRC-12002338   | ChiCTR-TRC-12002386   | ChiCTR-TRC-12002416   | ChiCTR-TRC-12002474   |
| ChiCTR-TRC-12002604   | ChiCTR-TRC-12002784   | ChiCTR-TRC-12002794   | ChiCTR-TRC-12002846   |
| ChiCTR-TRC-12002850   | ChiCTR-TRC-12002857   | ChiCTR-TRC-12002973   | ChiCTR-TRC-12003035   |
| ChiCTR-TRC-12003489   | ChiCTR-TRC-12004548   | ChiCTR-TRC-13002981   | ChiCTR-TRC-13003025   |
| ChiCTR-TRC-13003037   | ChiCTR-TRC-13003200   | ChiCTR-TRC-13003202   | ChiCTR-TRC-13003236   |
| ChiCTR-TRC-13003242   | ChiCTR-TRC-13003250   | ChiCTR-TRC-13003265   | ChiCTR-TRC-13003321   |
| ChiCTR-TRC-13003337   | ChiCTR-TRC-13003368   | ChiCTR-TRC-13003422   | ChiCTR-TRC-13003494   |
| ChiCTR-TRC-13003537   | ChiCTR-TRC-13003544   | ChiCTR-TRC-13003588   | ChiCTR-TRC-13003661   |
| ChiCTR-TRC-13003664   | ChiCTR-TRC-13003683   | ChiCTR-TRC-13003702   | ChiCTR-TRC-13003705   |
| ChiCTR-TRC-13003715   | ChiCTR-TRC-13003738   | ChiCTR-TRC-13003893   | ChiCTR-TRC-13003927   |
| ChiCTR-TRC-13003948   | ChiCTR-TRC-13003966   | ChiCTR-TRC-13004026   | ChiCTR-TRC-13004081   |
| ChiCTR-TRC-13004091   | ChiCTR-TRC-14004092   | ChiCTR-TRC-14004385   | ChiCTR-TRC-14004448   |
| ChiCTR-TRC-14004517   | ChiCTR-TRC-14004529   | ChiCTR-TRC-14004620   | ChiCTR-TRC-14004730   |
| ChiCTR-TRC-14004765   | ChiCTR-TRC-14004980   | ChiCTR-TRC-14005146   | ChiCTR-TRC-14005214   |
| ChiCTR-TRC-14005243   | ChiCTR-TRC-14005244   | ChiCTR-TTRCC-12002866 | ChiCTR-TTRCC-13003157 |
| ChiCTR-TTRCC-13003235 | ChiCTR-TTRCC-14004702 | ChiCTR-COC-16008038   | ChiCTR-IIN-16008500   |
| ChiCTR-IIR-16008601   | ChiCTR-IIR-16009015   | ChiCTR-INC-16007897   | ChiCTR-IIC-16008382   |
| ChiCTR-IOR-16007694   | ChiCTR-IOR-16007697   | ChiCTR-IIR-16007751   | ChiCTR-IOR-16008003   |
| ChiCTR-IOR-16008036   | ChiCTR-IOR-16008321   | ChiCTR-IOR-16008327   | ChiCTR-IIR-16008359   |
| ChiCTR-IOR-16008384   | ChiCTR-IIR-16008972   | ChiCTR-IOR-16008392   | ChiCTR-IOR-16008394   |
| ChiCTR-INR-16008410   | ChiCTR-IOR-16008433   | ChiCTR-IOR-16008737   | ChiCTR-INR-16008745   |
| ChiCTR-IOR-16008855   | ChiCTR-INR-16008807   | ChiCTR-IOR-16008997   | ChiCTR-INR-16008876   |
| ChiCTR-IOR-16009081   | ChiCTR-INR-16008956   | ChiCTR-INR-16009038   | ChiCTR-INR-16009084   |
| ChiCTR-IPR-16007792   | ChiCTR-IPR-16007835   | ChiCTR-IPR-16008590   | ChiCTR-IPR-16009062   |
| ChiCTR-ONC-16008030   | ChiCTR-IOR-16007798   | ChiCTR-IOR-16007945   | ChiCTR-IOR-16008001   |
| ChiCTR-IOR-16008082   | ChiCTR-IOR-16008087   | ChiCTR-IOR-16008546   | ChiCTR-IOR-16008779   |
| ChiCTR-IOR-16008941   | ChiCTR-IOR-16008976   | ChiCTR-OOC-16008238   | ChiCTR-OOC-16008573   |
| ChiCTR-OOC-16008777   | ChiCTR-OPC-16008451   | ChiCTR-POC-16008026   | ChiCTR-IPR-16008420   |
| ChiCTR-IPR-16008788   | ChiCTR-IPR-16008973   | ChiCTR-OIC-16007950   | ChiCTR-OOC-16007763   |
| ChiCTR-OOC-16008002   | ChiCTR-OOC-16008246   | ChiCTR-OOC-16008426   | ChiCTR-OPN-16008374   |
| ChiCTR-ROC-16008712   | ChiCTR-COC-16008742   | ChiCTR-IIR-16007736   | ChiCTR-INR-16007686   |
| ChiCTR-INR-16007810   | ChiCTR-INR-16007941   | ChiCTR-INR-16008644   | ChiCTR-INR-16008800   |
| ChiCTR-INR-16008891   | ChiCTR-INR-16008930   | ChiCTR-INR-16009031   | ChiCTR-IOC-16007711   |
| ChiCTR-ION-16008726   | ChiCTR-IOR-16007795   | ChiCTR-IOR-16007925   | ChiCTR-IOR-16008150   |
| ChiCTR-IOR-16008159   | ChiCTR-IOR-16008323   | ChiCTR-IOR-16008362   | ChiCTR-IOR-16008386   |
| ChiCTR-IOR-16008557   | ChiCTR-IOR-16008627   | ChiCTR-IOR-16008843   | ChiCTR-IOR-16008967   |
| ChiCTR-IOR-16009082   | ChiCTR-IPR-16008108   | ChiCTR-IPR-16008966   | ChiCTR-IPR-16009049   |

|                     |                     |                     |                     |
|---------------------|---------------------|---------------------|---------------------|
| ChiCTR-OIC-16008439 | ChiCTR-ONN-16008538 | ChiCTR-OOC-16007705 | ChiCTR-OOC-16008234 |
| ChiCTR-OOC-16008514 | ChiCTR-ROC-16008945 | ChiCTR-IIR-16008058 | ChiCTR-IIR-16008624 |
| ChiCTR-IIR-16008902 | ChiCTR-IIR-16008992 | ChiCTR-IIR-16009020 | ChiCTR-INR-16007707 |
| ChiCTR-INR-16007766 | ChiCTR-INR-16008032 | ChiCTR-INR-16008102 | ChiCTR-INR-16008136 |
| ChiCTR-INR-16008356 | ChiCTR-INR-16008409 | ChiCTR-INR-16008440 | ChiCTR-INR-16008879 |
| ChiCTR-INR-16009001 | ChiCTR-INR-16009028 | ChiCTR-INR-16009079 | ChiCTR-IOR-16007693 |
| ChiCTR-IOR-16007758 | ChiCTR-IOR-16008027 | ChiCTR-IOR-16008031 | ChiCTR-IOR-16008083 |
| ChiCTR-IOR-16008103 | ChiCTR-IOR-16008151 | ChiCTR-IOR-16008669 | ChiCTR-IOR-16008701 |
| ChiCTR-IOR-16008924 | ChiCTR-IOR-16008947 | ChiCTR-IOR-16009022 | ChiCTR-IOR-16009045 |
| ChiCTR-IPC-16007832 | ChiCTR-IPR-16007802 | ChiCTR-IPR-16007809 | ChiCTR-IPR-16008090 |
| ChiCTR-IPR-16008309 | ChiCTR-IPR-16008365 | ChiCTR-IPR-16008486 | ChiCTR-IPR-16008599 |
| ChiCTR-IPR-16008612 | ChiCTR-IPR-16008775 | ChiCTR-IPR-16009029 | ChiCTR-ORC-16008438 |
| ChiCTR-POC-16009019 | ChiCTR-ROC-16008339 | ChiCTR-IOR-16009132 | ChiCTR-INR-16009821 |
| ChiCTR-IOR-16010283 | ChiCTR-INR-16010239 | ChiCTR-INR-16010231 | ChiCTR-IDR-16010225 |
| ChiCTR-IOR-16010192 | ChiCTR-INR-16010175 | ChiCTR-INR-16010165 | ChiCTR-IPR-16010154 |
| ChiCTR-POC-16010170 | ChiCTR-INR-16010149 | ChiCTR-IOR-16010140 | ChiCTR-IOR-16010107 |
| ChiCTR-IOR-16010116 | ChiCTR-INR-16010075 | ChiCTR-OOC-16010080 | ChiCTR-OOC-17010751 |
| ChiCTR-INR-16010063 | ChiCTR-OOC-16010058 | ChiCTR-DDC-16010065 | ChiCTR-INR-16010066 |
| ChiCTR-IOR-16010072 | ChiCTR-IOR-16010252 | ChiCTR-INR-16010048 | ChiCTR-INR-16010035 |
| ChiCTR-OPh-16010029 | ChiCTR-INR-16010047 | ChiCTR-IOR-16010001 | ChiCTR-OOC-16010002 |
| ChiCTR-INR-16009990 | ChiCTR-IOR-16009992 | ChiCTR-INR-16009985 | ChiCTR-INR-16009967 |
| ChiCTR-IPR-16010258 | ChiCTR-IOR-16009968 | ChiCTR-INR-16009944 | ChiCTR-IOR-16009945 |
| ChiCTR-IOR-16009948 | ChiCTR-INR-16009952 | ChiCTR-IOR-16009934 | ChiCTR-ONR-16009937 |
| ChiCTR-INR-16009927 | ChiCTR-IOR-16009928 | ChiCTR-INR-16009914 | ChiCTR-IOR-16009919 |
| ChiCTR-INR-16009902 | ChiCTR-IOR-16009905 | ChiCTR-IOR-16009880 | ChiCTR-IOR-16009886 |
| ChiCTR-ROC-16009882 | ChiCTR-IIR-16009868 | ChiCTR-INR-16009864 | ChiCTR-OOC-16009861 |
| ChiCTR-INR-16009863 | ChiCTR-INR-16009858 | ChiCTR-IOR-16009828 | ChiCTR-ION-16009815 |
| ChiCTR-IOR-16009819 | ChiCTR-IOR-16009816 | ChiCTR-IOR-16009814 | ChiCTR-DDD-16009809 |
| ChiCTR-INR-16009818 | ChiCTR-IOR-16009804 | ChiCTR-IOR-16009797 | ChiCTR-INR-16009799 |
| ChiCTR-EOC-16009772 | ChiCTR-INR-16009786 | ChiCTR-DRD-16009773 | ChiCTR-INR-16009783 |
| ChiCTR-INR-16009761 | ChiCTR-INR-16009764 | ChiCTR-INR-16009774 | ChiCTR-IIR-16010104 |
| ChiCTR-INR-16009756 | ChiCTR-INR-16009746 | ChiCTR-IOR-16009739 | ChiCTR-IIR-16009732 |
| ChiCTR-IOR-16009733 | ChiCTR-INR-16009724 | ChiCTR-IOR-16009876 | ChiCTR-IOR-16010253 |
| ChiCTR-IOR-16009728 | ChiCTR-INR-16009723 | ChiCTR-IOR-16009708 | ChiCTR-DDD-16009705 |
| ChiCTR-INR-16009701 | ChiCTR-ROC-16009682 | ChiCTR-INR-16009652 | ChiCTR-IPR-16009669 |
| ChiCTR-OOC-16009632 | ChiCTR-INR-16009629 | ChiCTR-ONC-16009621 | ChiCTR-IOR-16009616 |
| ChiCTR-OOC-16009671 | ChiCTR-IOR-16009607 | ChiCTR-INR-16009586 | ChiCTR-IOR-16009637 |
| ChiCTR-INR-16009610 | ChiCTR-ROC-16009630 | ChiCTR-INR-16009618 | ChiCTR-IOR-16009599 |
| ChiCTR-INR-16009592 | ChiCTR-IPR-16009588 | ChiCTR-IPR-16009578 | ChiCTR-ONN-16009534 |
| ChiCTR-INR-16009557 | ChiCTR-INR-16009552 | ChiCTR-INR-16009538 | ChiCTR-IPR-16009517 |
| ChiCTR-INR-16009530 | ChiCTR-POC-16009499 | ChiCTR-IOR-16009496 | ChiCTR-INR-16009488 |
| ChiCTR-IOR-16009469 | ChiCTR-IOR-16009674 | ChiCTR-INR-16009456 | ChiCTR-INR-16009455 |
| ChiCTR-INR-16009429 | ChiCTR-ORC-16009441 | ChiCTR-OOC-16009443 | ChiCTR-IOR-16009410 |
| ChiCTR-IIR-16009398 | ChiCTR-INR-16009404 | ChiCTR-INR-16009401 | ChiCTR-IOR-16009391 |
| ChiCTR-INR-16009384 | ChiCTR-IOR-16009378 | ChiCTR-INR-16009363 | ChiCTR-INR-16009359 |

|                     |                     |                     |                     |
|---------------------|---------------------|---------------------|---------------------|
| ChiCTR-INR-16009364 | ChiCTR-IOR-16009850 | ChiCTR-INR-16009345 | ChiCTR-IIR-16009341 |
| ChiCTR-IOR-16009331 | ChiCTR-INR-16009328 | ChiCTR-POC-16009334 | ChiCTR-EOC-16009322 |
| ChiCTR-IOR-16009312 | ChiCTR-IOR-16009308 | ChiCTR-IIR-16010284 | ChiCTR-INR-16010128 |
| ChiCTR-IIR-16009264 | ChiCTR-INR-16009265 | ChiCTR-IPR-16009256 | ChiCTR-IOR-16009242 |
| ChiCTR-ONh-16009236 | ChiCTR-BOC-16009241 | ChiCTR-IOR-16009485 | ChiCTR-INR-16009212 |
| ChiCTR-ONC-16009218 | ChiCTR-IOR-16009210 | ChiCTR-IOR-16009268 | ChiCTR-INQ-16009186 |
| ChiCTR-IOR-16009173 | ChiCTR-OOC-16009170 | ChiCTR-IOR-16009148 | ChiCTR-INR-16009158 |
| ChiCTR-IOR-16009211 | ChiCTR-RRC-16009120 | ChiCTR-IOC-16009123 | ChiCTR-IPR-16009144 |
| ChiCTR-IOR-16009269 | ChiCTR-ROC-17014232 | ChiCTR-IOR-17014229 | ChiCTR-IIN-17014220 |
| ChiCTR-IND-17014221 | ChiCTR-IOR-17014195 | ChiCTR-IOR-17014206 | ChiCTR-IPR-17014157 |
| ChiCTR-IOR-17014149 | ChiCTR-ROC-17014146 | ChiCTR-IOR-17014139 | ChiCTR-IOC-17013954 |
| ChiCTR-IOC-17013974 | ChiCTR-ROC-17013955 | ChiCTR-ROC-17013957 | ChiCTR-IOR-17013931 |
| ChiCTR-IIC-17013986 | ChiCTR-OPC-17013912 | ChiCTR-IOR-17013910 | ChiCTR-IIR-17013983 |
| ChiCTR-IOR-17013875 | ChiCTR-IOR-17013829 | ChiCTR-ONB-17013805 | ChiCTR-IOR-17013791 |
| ChiCTR-IIC-17013769 | ChiCTR-IOR-17013779 | ChiCTR-IPR-17013758 | ChiCTR-IPR-17013756 |
| ChiCTR-INR-17013757 | ChiCTR-IOR-17013699 | ChiCTR-INR-17013668 | ChiCTR-IPR-17013652 |
| ChiCTR-INR-17013653 | ChiCTR-IOR-17013646 | ChiCTR-INR-17013624 | ChiCTR-IIR-17013609 |
| ChiCTR-OOQ-17013588 | ChiCTR-INR-17013574 | ChiCTR-IOR-17013577 | ChiCTR-INR-17013576 |
| ChiCTR-IOR-17013560 | ChiCTR-IOR-17013554 | ChiCTR-INR-17012438 | ChiCTR-IOR-17013541 |
| ChiCTR-IIR-17013532 | ChiCTR-IOR-17014188 | ChiCTR-IOR-17013498 | ChiCTR-IOR-17013491 |
| ChiCTR-INR-17013495 | ChiCTR-INR-17013467 | ChiCTR-IPR-17013465 | ChiCTR-INR-17013463 |
| ChiCTR-IIR-17013453 | ChiCTR-INR-17013439 | ChiCTR-INR-17013421 | ChiCTR-BON-17013420 |
| ChiCTR-INR-17013431 | ChiCTR-TNC-17013407 | ChiCTR-IOR-17013390 | ChiCTR-ONB-17013394 |
| ChiCTR-IOR-17013387 | ChiCTR-IOR-17013378 | ChiCTR-IOR-17013361 | ChiCTR-IPD-17013330 |
| ChiCTR-IID-17013318 | ChiCTR-OID-17013317 | ChiCTR-IOR-17013298 | ChiCTR-OOC-17013307 |
| ChiCTR-IIR-17013275 | ChiCTR-INR-17013281 | ChiCTR-INR-17013263 | ChiCTR-INR-17013222 |
| ChiCTR-INR-17013201 | ChiCTR-IOR-17013189 | ChiCTR-ROC-17013184 | ChiCTR-IPR-17013173 |
| ChiCTR-INR-17013157 | ChiCTR-INR-17013168 | ChiCTR-INR-17013155 | ChiCTR-INR-17013142 |
| ChiCTR-OPR-17013127 | ChiCTR-IPR-17013088 | ChiCTR-INR-17013078 | ChiCTR-INC-17013053 |
| ChiCTR-IOR-17013031 | ChiCTR-INR-17013045 | ChiCTR-IIR-17013018 | ChiCTR-INR-17013027 |
| ChiCTR-INR-17013012 | ChiCTR-ROC-17013002 | ChiCTR-OOC-17012995 | ChiCTR-IPR-17012999 |
| ChiCTR-IPR-17013000 | ChiCTR-IOR-17012986 | ChiCTR-IIR-17012977 | ChiCTR-ORC-17012970 |
| ChiCTR-INR-17012973 | ChiCTR-INR-17012955 | ChiCTR-ONR-17012963 | ChiCTR-INR-17012967 |
| ChiCTR-INR-17012951 | ChiCTR-INR-17012938 | ChiCTR-DDD-17012937 | ChiCTR-IOR-17012918 |
| ChiCTR-ROC-17012900 | ChiCTR-INR-17012907 | ChiCTR-INR-17012893 | ChiCTR-INC-17012872 |
| ChiCTR-IIC-17012861 | ChiCTR-IOR-17012868 | ChiCTR-IOR-17012835 | ChiCTR-ROC-17012832 |
| ChiCTR-ROC-17012833 | ChiCTR-IOR-17012818 | ChiCTR-IOR-17012811 | ChiCTR-INR-17012803 |
| ChiCTR-INR-17012795 | ChiCTR-IOR-17012792 | ChiCTR-ROC-17012727 | ChiCTR-ROC-17012761 |
| ChiCTR-IOR-17012693 | ChiCTR-IOR-17012684 | ChiCTR-IOR-17012681 | ChiCTR-INR-17012674 |
| ChiCTR-IIR-17012663 | ChiCTR-INR-17012670 | ChiCTR-ONC-17012705 | ChiCTR-IOR-17012628 |
| ChiCTR-OOH-17012624 | ChiCTR-IOR-17012621 | ChiCTR-OPC-17012609 | ChiCTR-IOR-17012610 |
| ChiCTR-IOR-17012605 | ChiCTR-OOC-17012571 | ChiCTR-OPC-17012568 | ChiCTR-IOR-17012516 |
| ChiCTR-IPR-17012500 | ChiCTR-IPR-17012502 | ChiCTR-INR-17012499 | ChiCTR-INR-17012501 |
| ChiCTR-IOR-17012495 | ChiCTR-INR-17012490 | ChiCTR-IOR-17012471 | ChiCTR-CDC-17012472 |
| ChiCTR-IOR-17012468 | ChiCTR-ONC-17012457 | ChiCTR-INR-17012452 | ChiCTR-IOR-17012447 |

|                     |                     |                     |                     |
|---------------------|---------------------|---------------------|---------------------|
| ChiCTR-IOR-17012434 | ChiCTR-IOR-17012437 | ChiCTR-IOR-17012419 | ChiCTR-IIR-17012422 |
| ChiCTR-IOR-17012421 | ChiCTR-IOR-17012416 | ChiCTR-ROC-17012410 | ChiCTR-IOR-17012400 |
| ChiCTR-INR-17012389 | ChiCTR-IOR-17012384 | ChiCTR-IOR-17012383 | ChiCTR-INR-17012385 |
| ChiCTR-IOR-17012371 | ChiCTR-POC-17012376 | ChiCTR-IOR-17012354 | ChiCTR-IOR-17012364 |
| ChiCTR-IOR-17012337 | ChiCTR-ONH-17012340 | ChiCTR-ONC-17012326 | ChiCTR-OPC-17012318 |
| ChiCTR-INR-17012303 | ChiCTR-INR-17012297 | ChiCTR-IOR-17012282 | ChiCTR-IOR-17012287 |
| ChiCTR-ONN-17012279 | ChiCTR-INR-17012246 | ChiCTR-IIR-17012250 | ChiCTR-ONN-17012256 |
| ChiCTR-IOR-17012238 | ChiCTR-IOR-17012232 | ChiCTR-IOR-17012172 | ChiCTR-INR-17012726 |
| ChiCTR-IOR-17012154 | ChiCTR-OOC-17012155 | ChiCTR-IPR-17012151 | ChiCTR-IOC-17012149 |
| ChiCTR-ROC-17012129 | ChiCTR-IOR-17012477 | ChiCTR-INR-17012118 | ChiCTR-IOR-17012111 |
| ChiCTR-IPR-17012100 | ChiCTR-ONN-17012076 | ChiCTR-IOR-17012066 | ChiCTR-INR-17012064 |
| ChiCTR-IOR-17012052 | ChiCTR-INR-17012062 | ChiCTR-INR-17012070 | ChiCTR-IPR-17012014 |
| ChiCTR-RRC-17012022 | ChiCTR-INR-17012003 | ChiCTR-INR-17011997 | ChiCTR-IPR-17011989 |
| ChiCTR-IPR-17011987 | ChiCTR-IPR-17011990 | ChiCTR-IOR-17011962 | ChiCTR-IPR-17011944 |
| ChiCTR-INR-17011949 | ChiCTR-IIR-17011940 | ChiCTR-OPh-17011932 | ChiCTR-INR-17011916 |
| ChiCTR-ONN-17011909 | ChiCTR-IIR-17011889 | ChiCTR-OIC-17011885 | ChiCTR-IPR-17011893 |
| ChiCTR-IPR-17011876 | ChiCTR-INR-17011839 | ChiCTR-IOR-17011844 | ChiCTR-IIR-17011845 |
| ChiCTR-IIR-17011831 | ChiCTR-IOR-17011817 | ChiCTR-OPN-17011798 | ChiCTR-IOR-17011785 |
| ChiCTR-INR-17012175 | ChiCTR-INR-17011791 | ChiCTR-IOR-17011764 | ChiCTR-ORC-17011760 |
| ChiCTR-IOR-17011746 | ChiCTR-IPR-17011699 | ChiCTR-IOR-17011697 | ChiCTR-INR-17011685 |
| ChiCTR-INR-17011674 | ChiCTR-OPC-17011644 | ChiCTR-IOR-17011631 | ChiCTR-IPR-17011618 |
| ChiCTR-INR-17011596 | ChiCTR-IOR-17011597 | ChiCTR-IIR-17011612 | ChiCTR-INR-17011591 |
| ChiCTR-INR-17011569 | ChiCTR-INR-17011560 | ChiCTR-IPR-17011555 | ChiCTR-IPR-17011549 |
| ChiCTR-IIR-17011529 | ChiCTR-IOR-17011518 | ChiCTR-IIR-17011513 | ChiCTR-INR-17011491 |
| ChiCTR-INR-17011493 | ChiCTR-DOD-17011498 | ChiCTR-IOR-17011478 | ChiCTR-INR-17011473 |
| ChiCTR-OOH-17011471 | ChiCTR-INR-17011472 | ChiCTR-BOC-17011442 | ChiCTR-ROC-17011441 |
| ChiCTR-ROC-17011443 | ChiCTR-IOR-17011429 | ChiCTR-IIR-17011407 | ChiCTR-INR-17011400 |
| ChiCTR-INR-17011397 | ChiCTR-IPR-17011395 | ChiCTR-OOC-17011372 | ChiCTR-IPR-17011383 |
| ChiCTR-ORC-17011368 | ChiCTR-ERC-17011371 | ChiCTR-INR-17011346 | ChiCTR-INR-17011357 |
| ChiCTR-INR-17011361 | ChiCTR-IOR-17011359 | ChiCTR-ONN-17011323 | ChiCTR-INR-17011309 |
| ChiCTR-IPR-17011451 | ChiCTR-IOR-17011307 | ChiCTR-IOR-17011302 | ChiCTR-OIC-17011288 |
| ChiCTR-INR-17011284 | ChiCTR-IPR-17011247 | ChiCTR-IOR-17011245 | ChiCTR-IOR-17011232 |
| ChiCTR-INR-17011194 | ChiCTR-IOR-17011187 | ChiCTR-POC-17011162 | ChiCTR-IOR-17011131 |
| ChiCTR-OOC-17011452 | ChiCTR-IOR-17011118 | ChiCTR-INR-17011110 | ChiCTR-IIR-17011106 |
| ChiCTR-OOC-17011086 | ChiCTR-IOR-17011083 | ChiCTR-ONC-17011078 | ChiCTR-IOR-17011067 |
| ChiCTR-INR-17011062 | ChiCTR-IPR-17011069 | ChiCTR-INR-17011060 | ChiCTR-IOR-17012174 |
| ChiCTR-INR-17011056 | ChiCTR-INR-17011057 | ChiCTR-INR-17011042 | ChiCTR-IPR-17011035 |
| ChiCTR-INR-17011023 | ChiCTR-IOR-17011028 | ChiCTR-IOR-17011026 | ChiCTR-IOR-17011036 |
| ChiCTR-DDD-17011032 | ChiCTR-IOR-17011014 | ChiCTR-OOC-17012710 | ChiCTR-IOR-17011009 |
| ChiCTR-OOC-17012712 | ChiCTR-OOC-17012711 | ChiCTR-INR-17010994 | ChiCTR-IOR-17010992 |
| ChiCTR-IPR-17010970 | ChiCTR-INR-17010972 | ChiCTR-IOR-17010938 | ChiCTR-IOR-17010939 |
| ChiCTR-IPR-17010940 | ChiCTR-IOR-17010937 | ChiCTR-IOR-17010927 | ChiCTR-INR-17010922 |
| ChiCTR-IOR-17010910 | ChiCTR-IOR-17010860 | ChiCTR-IOR-17010861 | ChiCTR-BON-17010848 |
| ChiCTR-ONC-17010842 | ChiCTR-BON-17010840 | ChiCTR-INR-17010809 | ChiCTR-IOR-17010804 |
| ChiCTR-INR-17010801 | ChiCTR-INR-17010793 | ChiCTR-INR-17010770 | ChiCTR-IOR-17010769 |



|                     |                     |                     |                     |
|---------------------|---------------------|---------------------|---------------------|
| ChiCTR-IPR-17010764 | ChiCTR-IOR-17010765 | ChiCTR-IOR-17010763 | ChiCTR-INR-17010760 |
| ChiCTR-IPR-17010754 | ChiCTR-IOR-17010753 | ChiCTR-IPR-17010752 | ChiCTR-IIR-17010747 |
| ChiCTR-IOR-17010748 | ChiCTR-INR-17010790 | ChiCTR-IOR-17010706 | ChiCTR-DOQ-17010707 |
| ChiCTR-INR-17010696 | ChiCTR-IOR-17010701 | ChiCTR-EON-17010697 | ChiCTR-INR-17010694 |
| ChiCTR-INR-17010689 | ChiCTR-INR-17010685 | ChiCTR-OON-17010690 | ChiCTR-INR-17010674 |
| ChiCTR-INR-17010667 | ChiCTR-IOR-17010669 | ChiCTR-BPC-17010638 | ChiCTR-IOR-17010600 |
| ChiCTR-IOR-17010583 | ChiCTR-IOR-17010580 | ChiCTR-IPR-17010558 | ChiCTR-INR-17010559 |
| ChiCTR-IOR-17010551 | ChiCTR-IOR-17010544 | ChiCTR-INR-16009989 | ChiCTR-OON-17010539 |
| ChiCTR-ROC-17010527 | ChiCTR-IOR-17010516 | ChiCTR-INR-17010502 | ChiCTR-IOR-17010505 |
| ChiCTR-IIR-17010797 | ChiCTR-ORC-17010497 | ChiCTR-IPR-17010490 | ChiCTR-IOR-17010488 |
| ChiCTR-IPR-17010478 | ChiCTR-INR-17010467 | ChiCTR-IOR-17010465 | ChiCTR-INR-17010458 |
| ChiCTR-INR-17010447 | ChiCTR-IPR-17010446 | ChiCTR-IOR-17010870 | ChiCTR-INR-17010410 |
| ChiCTR-IOR-17010403 | ChiCTR-ROC-17010393 | ChiCTR-IOR-17010397 | ChiCTR-IPR-17010388 |
| ChiCTR-IPR-17010335 | ChiCTR-INR-17010324 | ChiCTR-INR-17010326 | ChiCTR-IPR-17012972 |

ClinicalTrials.gov (1094)

|             |             |             |             |
|-------------|-------------|-------------|-------------|
| NCT00142532 | NCT00186654 | NCT00200096 | NCT00244894 |
| NCT00253708 | NCT00261755 | NCT00284492 | NCT00329212 |
| NCT00346736 | NCT00351806 | NCT00352248 | NCT00360841 |
| NCT00379327 | NCT00393510 | NCT00402961 | NCT00449241 |
| NCT00455182 | NCT00487266 | NCT00508482 | NCT00547690 |
| NCT00548223 | NCT00554723 | NCT00569088 | NCT00570024 |
| NCT00598988 | NCT00636012 | NCT00655317 | NCT00689897 |
| NCT00710164 | NCT00722462 | NCT00803582 | NCT00826397 |
| NCT00839592 | NCT00856167 | NCT00887172 | NCT00890474 |
| NCT00900965 | NCT00932139 | NCT00945074 | NCT00948870 |
| NCT00965367 | NCT00965471 | NCT00974519 | NCT01013337 |
| NCT01022177 | NCT01037894 | NCT01049074 | NCT01055561 |
| NCT01096420 | NCT01104428 | NCT01112943 | NCT01149317 |
| NCT01162317 | NCT01163409 | NCT01174394 | NCT01182025 |
| NCT01201642 | NCT01264068 | NCT01266044 | NCT01296009 |
| NCT00103675 | NCT00136669 | NCT00142597 | NCT00148577 |
| NCT01315561 | NCT00155675 | NCT01335282 | NCT00177450 |
| NCT00200889 | NCT01339715 | NCT01345409 | NCT00209001 |
| NCT01366456 | NCT01368393 | NCT00221247 | NCT00246350 |
| NCT00275574 | NCT00279071 | NCT01411501 | NCT01421615 |
| NCT00299975 | NCT00302185 | NCT00312585 | NCT00317291 |
| NCT00317317 | NCT01431352 | NCT01439412 | NCT00325663 |
| NCT01441752 | NCT01447329 | NCT00334165 | NCT00335946 |
| NCT00352352 | NCT00369902 | NCT01500330 | NCT00419822 |
| NCT00425776 | NCT00432289 | NCT00502619 | NCT00521547 |
| NCT00528125 | NCT00528554 | NCT01508403 | NCT01530321 |
| NCT00540397 | NCT00543426 | NCT00571480 | NCT00591877 |
| NCT00599677 | NCT01545960 | NCT01612585 | NCT00602160 |

|             |             |             |             |
|-------------|-------------|-------------|-------------|
| NCT00608660 | NCT01627444 | NCT01659216 | NCT00624793 |
| NCT01678586 | NCT01681485 | NCT01682551 | NCT01686230 |
| NCT00646633 | NCT00658034 | NCT00674713 | NCT01701726 |
| NCT00736411 | NCT00768014 | NCT00828516 | NCT01706081 |
| NCT01715376 | NCT00855140 | NCT01726504 | NCT01733914 |
| NCT01745328 | NCT01750515 | NCT00859365 | NCT00883831 |
| NCT00885183 | NCT01765959 | NCT01780181 | NCT01781676 |
| NCT01802021 | NCT01804816 | NCT00887133 | NCT00921492 |
| NCT00935155 | NCT01805765 | NCT01813396 | NCT00950482 |
| NCT00952432 | NCT00957112 | NCT00963287 | NCT00969267 |
| NCT01815346 | NCT01816386 | NCT00969280 | NCT00974454 |
| NCT01824719 | NCT01824732 | NCT01003470 | NCT01003951 |
| NCT01834105 | NCT01005108 | NCT01022827 | NCT01848158 |
| NCT01848587 | NCT01030029 | NCT01047384 | NCT01053533 |
| NCT01060553 | NCT01849172 | NCT01853371 | NCT01102816 |
| NCT01116453 | NCT01142479 | NCT01162018 | NCT01165099 |
| NCT01862653 | NCT01891097 | NCT01178008 | NCT01197950 |
| NCT01913587 | NCT01231425 | NCT01973010 | NCT01233180 |
| NCT01250093 | NCT01259180 | NCT01274793 | NCT01283477 |
| NCT01285687 | NCT01987583 | NCT02000752 | NCT01301482 |
| NCT01302769 | NCT01304979 | NCT01338701 | NCT02013908 |
| NCT02024451 | NCT01357343 | NCT01360229 | NCT01389622 |
| NCT02069665 | NCT01398930 | NCT01408212 | NCT01422928 |
| NCT01442012 | NCT02070029 | NCT02076308 | NCT01471275 |
| NCT01481090 | NCT01481103 | NCT01483885 | NCT02079857 |
| NCT02084186 | NCT01487590 | NCT01491321 | NCT01495286 |
| NCT01500967 | NCT02087488 | NCT02090686 | NCT01554930 |
| NCT01570127 | NCT02108236 | NCT02127255 | NCT02128009 |
| NCT01572168 | NCT01595451 | NCT01598974 | NCT01612533 |
| NCT02192645 | NCT02195908 | NCT02197663 | NCT01612572 |
| NCT01614639 | NCT01631500 | NCT01633281 | NCT01634022 |
| NCT01635634 | NCT01643577 | NCT01650207 | NCT02232282 |
| NCT02236260 | NCT01669759 | NCT01674387 | NCT01687660 |
| NCT02239159 | NCT01697761 | NCT01752010 | NCT01761331 |
| NCT02254603 | NCT02261571 | NCT02269371 | NCT01773291 |
| NCT01784172 | NCT01791933 | NCT01804569 | NCT02276404 |
| NCT02290015 | NCT01836016 | NCT02299713 | NCT02299739 |
| NCT01875562 | NCT01879826 | NCT02305836 | NCT02319993 |
| NCT01909284 | NCT01913574 | NCT01918722 | NCT01919307 |
| NCT02339714 | NCT02340351 | NCT01956760 | NCT01965418 |
| NCT02362698 | NCT01970813 | NCT01975454 | NCT01978730 |
| NCT01988194 | NCT01989403 | NCT02381171 | NCT02387918 |
| NCT02392988 | NCT02402959 | NCT01996384 | NCT02033252 |
| NCT02039037 | NCT02047851 | NCT02413086 | NCT02438436 |
| NCT02451241 | NCT02452489 | NCT02053090 | NCT02062151 |

|             |             |             |             |
|-------------|-------------|-------------|-------------|
| NCT02460913 | NCT02468297 | NCT02086890 | NCT02471755 |
| NCT02491320 | NCT02087462 | NCT02100033 | NCT02498184 |
| NCT02110537 | NCT02142231 | NCT02503475 | NCT02147717 |
| NCT02167308 | NCT02188225 | NCT02197429 | NCT02199405 |
| NCT02526186 | NCT02206542 | NCT02210377 | NCT02219204 |
| NCT02232945 | NCT02260323 | NCT02263001 | NCT02269046 |
| NCT02275403 | NCT02538692 | NCT02540512 | NCT02300207 |
| NCT02309164 | NCT02311634 | NCT02320006 | NCT02328586 |
| NCT02339480 | NCT02541747 | NCT02545036 | NCT02358239 |
| NCT02547545 | NCT02548637 | NCT02362763 | NCT02369107 |
| NCT02553005 | NCT02553863 | NCT02572583 | NCT02573961 |
| NCT02583802 | NCT02590367 | NCT02597530 | NCT02599831 |
| NCT02605889 | NCT02382029 | NCT02619266 | NCT02383004 |
| NCT02384928 | NCT02631382 | NCT02637544 | NCT02388256 |
| NCT02394041 | NCT02420301 | NCT02421627 | NCT02676713 |
| NCT02446756 | NCT02449668 | NCT02455154 | NCT02472613 |
| NCT02488252 | NCT02490813 | NCT02508519 | NCT02510066 |
| NCT02530398 | NCT02530853 | NCT02533388 | NCT02556164 |
| NCT02561572 | NCT02575378 | NCT02577770 | NCT02594397 |
| NCT02594670 | NCT02603003 | NCT02604706 | NCT02605655 |
| NCT02608554 | NCT02639611 | NCT02644746 | NCT02656225 |
| NCT02674646 | NCT02821442 | NCT00233857 | NCT00245752 |
| NCT00253994 | NCT00260494 | NCT00260637 | NCT00275964 |
| NCT00286390 | NCT00307788 | NCT00307918 | NCT00328796 |
| NCT00353847 | NCT00376350 | NCT00379496 | NCT00388752 |
| NCT00401063 | NCT00404443 | NCT00405158 | NCT00417313 |
| NCT00421902 | NCT00430378 | NCT00460161 | NCT00464425 |
| NCT00470795 | NCT00487331 | NCT00493753 | NCT00508729 |
| NCT00547950 | NCT00549835 | NCT00554879 | NCT00602940 |
| NCT00610584 | NCT00621660 | NCT00676975 | NCT00685789 |
| NCT00694447 | NCT00724763 | NCT00732459 | NCT00741936 |
| NCT00758017 | NCT00779818 | NCT00799734 | NCT00804089 |
| NCT00813683 | NCT00815464 | NCT00815529 | NCT00826345 |
| NCT00838994 | NCT00843765 | NCT00862550 | NCT00868517 |
| NCT00874133 | NCT00891618 | NCT00892268 | NCT00907621 |
| NCT00913354 | NCT00925951 | NCT00932061 | NCT00933725 |
| NCT00966316 | NCT01014221 | NCT01017211 | NCT01045720 |
| NCT01052857 | NCT01057043 | NCT01059487 | NCT01079390 |
| NCT01079689 | NCT01102868 | NCT01124955 | NCT01138930 |
| NCT01163682 | NCT01182532 | NCT01189994 | NCT01224496 |
| NCT01226524 | NCT01232114 | NCT01270607 | NCT01271595 |
| NCT01271647 | NCT01274936 | NCT01275989 | NCT01276028 |
| NCT01278355 | NCT01289964 | NCT01369238 | NCT01373476 |
| NCT01389362 | NCT01395511 | NCT01399294 | NCT01452477 |
| NCT01454726 | NCT01482000 | NCT01486303 | NCT01492738 |

|             |             |             |             |
|-------------|-------------|-------------|-------------|
| NCT01512433 | NCT01526031 | NCT01535066 | NCT01541644 |
| NCT01579786 | NCT01612611 | NCT01619176 | NCT01637948 |
| NCT01650363 | NCT01665105 | NCT01666821 | NCT01671670 |
| NCT01696838 | NCT01701804 | NCT01715740 | NCT01745302 |
| NCT01774877 | NCT01781897 | NCT01800318 | NCT01864707 |
| NCT01869712 | NCT01879514 | NCT01881516 | NCT01881932 |
| NCT01883908 | NCT01907711 | NCT01921504 | NCT01931436 |
| NCT01939236 | NCT01984021 | NCT01995279 | NCT01996410 |
| NCT02006329 | NCT02011854 | NCT02011880 | NCT02027194 |
| NCT02029118 | NCT02047032 | NCT02047045 | NCT02064296 |
| NCT02066090 | NCT02081612 | NCT02093637 | NCT02094950 |
| NCT02104466 | NCT02116218 | NCT02126436 | NCT02135250 |
| NCT02150915 | NCT02153840 | NCT02158832 | NCT02186366 |
| NCT02189083 | NCT02194946 | NCT02197546 | NCT02210988 |
| NCT02251886 | NCT02257723 | NCT02260310 | NCT02270424 |
| NCT02271607 | NCT02294448 | NCT02303665 | NCT02304913 |
| NCT02324712 | NCT02332486 | NCT02333409 | NCT02333747 |
| NCT02356575 | NCT02358486 | NCT02364726 | NCT02427347 |
| NCT02453906 | NCT02456116 | NCT02456727 | NCT02475538 |
| NCT02478047 | NCT02480361 | NCT02522403 | NCT02526381 |
| NCT02535039 | NCT02539121 | NCT02568774 | NCT02580968 |
| NCT02583334 | NCT02589418 | NCT02591186 | NCT02592681 |
| NCT02603588 | NCT02607176 | NCT02612441 | NCT02624076 |
| NCT02633878 | NCT02641886 | NCT02704234 | NCT02712697 |
| NCT00104546 | NCT00153751 | NCT00172926 | NCT00177840 |
| NCT00200733 | NCT00217074 | NCT00219505 | NCT00225316 |
| NCT00297427 | NCT00320138 | NCT00322504 | NCT00333606 |
| NCT00355329 | NCT00375102 | NCT00414505 | NCT00459680 |
| NCT00523016 | NCT00545623 | NCT00599586 | NCT00635037 |
| NCT00639977 | NCT00641303 | NCT00682162 | NCT00692328 |
| NCT00714727 | NCT00746200 | NCT00780884 | NCT00786214 |
| NCT00797732 | NCT00826215 | NCT00860301 | NCT00882271 |
| NCT00885586 | NCT00904592 | NCT00917215 | NCT00920712 |
| NCT00935701 | NCT00950781 | NCT00964314 | NCT01002846 |
| NCT01018108 | NCT01040754 | NCT01043692 | NCT01050075 |
| NCT01054495 | NCT01088867 | NCT01094782 | NCT01105221 |
| NCT01116167 | NCT01141231 | NCT01152632 | NCT01205958 |
| NCT01223430 | NCT01227096 | NCT01231776 | NCT01247935 |
| NCT01275807 | NCT01293734 | NCT01305811 | NCT01331395 |
| NCT01345994 | NCT01350570 | NCT01354860 | NCT01362270 |
| NCT01376375 | NCT01389349 | NCT01417741 | NCT01449396 |
| NCT01457209 | NCT01476930 | NCT01486186 | NCT01492569 |
| NCT01502943 | NCT01512576 | NCT01534130 | NCT01555320 |
| NCT01558154 | NCT01573858 | NCT01580163 | NCT01580358 |
| NCT01604356 | NCT01612559 | NCT01612663 | NCT01613183 |

|             |             |             |             |
|-------------|-------------|-------------|-------------|
| NCT01621139 | NCT01622959 | NCT01633996 | NCT01651338 |
| NCT01677325 | NCT01695850 | NCT01707706 | NCT01727362 |
| NCT01729052 | NCT01747070 | NCT01752946 | NCT01778621 |
| NCT01780480 | NCT01790477 | NCT01799460 | NCT01806233 |
| NCT01811862 | NCT01812161 | NCT01812876 | NCT01814566 |
| NCT01840761 | NCT01844050 | NCT01892852 | NCT01913418 |
| NCT01920997 | NCT01922466 | NCT01923493 | NCT01926834 |
| NCT01931696 | NCT01933204 | NCT01937520 | NCT01940380 |
| NCT01940432 | NCT01945190 | NCT01972906 | NCT01975168 |
| NCT01987622 | NCT02012205 | NCT02026323 | NCT02051036 |
| NCT02053740 | NCT02085642 | NCT02098928 | NCT02122796 |
| NCT02129686 | NCT02148159 | NCT02152410 | NCT02167516 |
| NCT02168894 | NCT02195921 | NCT02204215 | NCT02215681 |
| NCT02241616 | NCT02255006 | NCT02255981 | NCT02269345 |
| NCT02275949 | NCT02292368 | NCT02295111 | NCT02313610 |
| NCT02321696 | NCT02324959 | NCT02326714 | NCT02362906 |
| NCT02364167 | NCT02399969 | NCT02423694 | NCT02432508 |
| NCT02438540 | NCT02442076 | NCT02448602 | NCT02457039 |
| NCT02469493 | NCT02486159 | NCT02491333 | NCT02509143 |
| NCT02516878 | NCT02525445 | NCT02543580 | NCT02545777 |
| NCT02551575 | NCT02554201 | NCT02559037 | NCT02564913 |
| NCT02571075 | NCT02579343 | NCT02580071 | NCT02580682 |
| NCT02580942 | NCT02587754 | NCT02588274 | NCT02589938 |
| NCT02602522 | NCT02610595 | NCT02611726 | NCT02615678 |
| NCT02623218 | NCT02638051 | NCT02640066 | NCT02644161 |
| NCT02651766 | NCT02656966 | NCT02680912 | NCT02690493 |
| NCT02691208 | NCT02725697 | NCT02731417 | NCT02741726 |
| NCT02744274 | NCT02752880 | NCT02770963 | NCT02781155 |
| NCT02781285 | NCT02781415 | NCT02798263 | NCT02815371 |
| NCT02844452 | NCT02846207 | NCT02855567 | NCT02868671 |
| NCT02871245 | NCT02871999 | NCT02873234 | NCT02646280 |
| NCT02653911 | NCT02657174 | NCT02678546 | NCT02714803 |
| NCT02728778 | NCT02752867 | NCT02754752 | NCT02759159 |
| NCT02785965 | NCT02794493 | NCT02794948 | NCT02795390 |
| NCT02822677 | NCT02824887 | NCT02850198 | NCT02850627 |
| NCT02851186 | NCT02857114 | NCT02861482 | NCT02871076 |
| NCT02872077 | NCT02876432 | NCT02683967 | NCT02705495 |
| NCT02706418 | NCT02729545 | NCT02741401 | NCT02746497 |
| NCT02762136 | NCT02767791 | NCT02769572 | NCT02777606 |
| NCT02777788 | NCT02783534 | NCT02803216 | NCT02870673 |
| NCT02878018 | NCT02880202 | NCT02681211 | NCT02690389 |
| NCT02691377 | NCT02693795 | NCT02707705 | NCT02731677 |
| NCT02761096 | NCT02764996 | NCT02765581 | NCT02772055 |
| NCT02803736 | NCT02813278 | NCT02831114 | NCT02834702 |
| NCT02840916 | NCT02841163 | NCT02842307 | NCT02855593 |

|             |             |             |             |
|-------------|-------------|-------------|-------------|
| NCT02869646 | NCT02871453 | NCT02914834 | NCT02864524 |
| NCT03008668 | NCT03007914 | NCT03005821 | NCT03005301 |
| NCT03015766 | NCT03008798 | NCT02996604 | NCT02979574 |
| NCT02979743 | NCT02975362 | NCT02976558 | NCT03054974 |
| NCT02972151 | NCT02969096 | NCT02964533 | NCT02969148 |
| NCT02959346 | NCT02953236 | NCT03135821 | NCT02951611 |
| NCT03012373 | NCT02955134 | NCT02945982 | NCT02940288 |
| NCT02948218 | NCT02937207 | NCT02959840 | NCT02929693 |
| NCT02983201 | NCT02926378 | NCT02920164 | NCT02921529 |
| NCT02924831 | NCT02931162 | NCT02923622 | NCT02915393 |
| NCT02908022 | NCT02895698 | NCT02892357 | NCT02882048 |
| NCT02905812 | NCT03036657 | NCT00000394 | NCT00002149 |
| NCT00000817 | NCT00005770 | NCT00011024 | NCT00010478 |
| NCT00010491 | NCT00010504 | NCT00010517 | NCT00010946 |
| NCT00010647 | NCT00010764 | NCT00010972 | NCT00040833 |
| NCT00039793 | NCT00035399 | NCT00034034 | NCT00033852 |
| NCT00032422 | NCT00029484 | NCT00029198 | NCT00072657 |
| NCT00071669 | NCT00071149 | NCT00070967 | NCT00070980 |
| NCT00070915 | NCT00070824 | NCT00067691 | NCT00065585 |
| NCT00065403 | NCT00065416 | NCT00065234 | NCT00064818 |
| NCT00064740 | NCT00060021 | NCT00059345 | NCT00058851 |
| NCT00057148 | NCT00055354 | NCT00096759 | NCT00094874 |
| NCT00093327 | NCT00090389 | NCT00090337 | NCT00086021 |
| NCT00082290 | NCT00081965 | NCT00079898 | NCT00079664 |
| NCT03386149 | NCT03386019 | NCT03389334 | NCT03380481 |
| NCT03381027 | NCT03372694 | NCT03372668 | NCT03378037 |
| NCT03373474 | NCT03374111 | NCT03364361 | NCT03364127 |
| NCT03380182 | NCT03366363 | NCT03359603 | NCT03350789 |
| NCT03373032 | NCT03342105 | NCT03341091 | NCT03354741 |
| NCT03391986 | NCT03347448 | NCT03343262 | NCT03329482 |
| NCT03338283 | NCT03332368 | NCT03335306 | NCT03320538 |
| NCT03314038 | NCT03309501 | NCT03328819 | NCT03328351 |
| NCT03299439 | NCT03330964 | NCT03299322 | NCT03287570 |
| NCT03290976 | NCT03282630 | NCT03274544 | NCT03325179 |
| NCT03275038 | NCT03274713 | NCT03282110 | NCT03290313 |
| NCT03260907 | NCT03261505 | NCT03319043 | NCT03276208 |
| NCT03255525 | NCT03255538 | NCT03258216 | NCT03250754 |
| NCT03386903 | NCT03264287 | NCT03245034 | NCT03297658 |
| NCT03249701 | NCT03238716 | NCT03291561 | NCT03252236 |
| NCT03291574 | NCT03234959 | NCT03236753 | NCT03230760 |
| NCT03235206 | NCT03232541 | NCT03232528 | NCT03237338 |
| NCT03235895 | NCT03244605 | NCT03221894 | NCT03228134 |
| NCT03246087 | NCT03222557 | NCT03217682 | NCT03213938 |
| NCT03196037 | NCT03197675 | NCT03292068 | NCT03189199 |
| NCT03199495 | NCT03187275 | NCT03183037 | NCT03185780 |

|             |             |             |             |
|-------------|-------------|-------------|-------------|
| NCT03186625 | NCT03185923 | NCT03186079 | NCT03177889 |
| NCT03189992 | NCT03178604 | NCT03180320 | NCT03174379 |
| NCT03178175 | NCT03174535 | NCT03299192 | NCT03173027 |
| NCT03173040 | NCT03375970 | NCT03170557 | NCT03187782 |
| NCT03168477 | NCT03167736 | NCT03167710 | NCT03170648 |
| NCT03194191 | NCT03169504 | NCT03204903 | NCT03199781 |
| NCT03171519 | NCT03165370 | NCT03167918 | NCT03197207 |
| NCT03156530 | NCT03145727 | NCT03171337 | NCT03147443 |
| NCT03142490 | NCT03126734 | NCT03142529 | NCT03125304 |
| NCT03149393 | NCT03117465 | NCT03116776 | NCT03124238 |
| NCT03120650 | NCT03108170 | NCT03107741 | NCT03114449 |
| NCT03099317 | NCT03099460 | NCT03099447 | NCT03099473 |
| NCT03093584 | NCT03093571 | NCT03133884 | NCT03097055 |
| NCT03122080 | NCT03080220 | NCT03084497 | NCT03078205 |
| NCT03088696 | NCT03100539 | NCT03081091 | NCT03095898 |
| NCT03080584 | NCT03245710 | NCT03094676 | NCT03072225 |
| NCT03046563 | NCT03061396 | NCT03057210 | NCT03046030 |
| NCT03077984 | NCT03041675 | NCT03030482 | NCT03025152 |
| NCT03211429 | NCT03187808 | NCT03027375 | NCT03016585 |
| NCT03019042 | NCT03018769 | NCT03018821 | NCT03025399 |
| NCT03012425 | NCT03010241 |             |             |

ISRCTN (146)

|                |                |                |                |
|----------------|----------------|----------------|----------------|
| ISRCTN02971192 | ISRCTN06223266 | ISRCTN10119971 | ISRCTN10634508 |
| ISRCTN13737091 | ISRCTN22214747 | ISRCTN22366060 | ISRCTN26438275 |
| ISRCTN30663359 | ISRCTN34440093 | ISRCTN40932605 | ISRCTN52683557 |
| ISRCTN56157078 | ISRCTN61674768 | ISRCTN66117475 | ISRCTN76896018 |
| ISRCTN80312467 | ISRCTN05293321 | ISRCTN83626912 | ISRCTN96103936 |
| ISRCTN97151578 | ISRCTN14667535 | ISRCTN98703707 | ISRCTN98859152 |
| ISRCTN17685397 | ISRCTN19413357 | ISRCTN23891318 | ISRCTN25134802 |
| ISRCTN29230777 | ISRCTN29932220 | ISRCTN32823720 | ISRCTN44706974 |
| ISRCTN49955124 | ISRCTN52062666 | ISRCTN58013563 | ISRCTN59155637 |
| ISRCTN59953486 | ISRCTN60867554 | ISRCTN66631530 | ISRCTN70177540 |
| ISRCTN74335441 | ISRCTN74414962 | ISRCTN78434638 | ISRCTN88008690 |
| ISRCTN90063632 | ISRCTN90807007 | ISRCTN99496264 | ISRCTN05305406 |
| ISRCTN06129599 | ISRCTN07165558 | ISRCTN07857866 | ISRCTN10708719 |
| ISRCTN12049699 | ISRCTN12585433 | ISRCTN12702489 | ISRCTN13130687 |
| ISRCTN13287728 | ISRCTN16079489 | ISRCTN24863192 | ISRCTN28687220 |
| ISRCTN34405634 | ISRCTN34841555 | ISRCTN40706107 | ISRCTN41033073 |
| ISRCTN43104115 | ISRCTN49335612 | ISRCTN50179298 | ISRCTN52695239 |
| ISRCTN57133712 | ISRCTN59267538 | ISRCTN61861069 | ISRCTN63787732 |
| ISRCTN65814467 | ISRCTN70448213 | ISRCTN81864187 | ISRCTN82980206 |
| ISRCTN84496835 | ISRCTN94142364 | ISRCTN97373659 | ISRCTN99395260 |
| ISRCTN08827905 | ISRCTN11374571 | ISRCTN15186354 | ISRCTN18177749 |

|                |                |                |                |
|----------------|----------------|----------------|----------------|
| ISRCTN18249834 | ISRCTN18291857 | ISRCTN21980724 | ISRCTN31072075 |
| ISRCTN34571027 | ISRCTN36780548 | ISRCTN39740785 | ISRCTN41571810 |
| ISRCTN49839714 | ISRCTN60217348 | ISRCTN71727232 | ISRCTN71727409 |
| ISRCTN84985339 | ISRCTN93327878 | ISRCTN99754128 | ISRCTN32748291 |
| ISRCTN81308551 | ISRCTN99117074 | ISRCTN14016893 | ISRCTN18135146 |
| ISRCTN92125844 | ISRCTN13358253 | ISRCTN23374750 | ISRCTN74318483 |
| ISRCTN69696725 | ISRCTN27450856 | ISRCTN16856737 | ISRCTN01382777 |
| ISRCTN61111416 | ISRCTN81672591 | ISRCTN96537534 | ISRCTN80764175 |
| ISRCTN88597683 | ISRCTN70292892 | ISRCTN61381178 | ISRCTN23245449 |
| ISRCTN28461103 | ISRCTN12159894 | ISRCTN14801647 | ISRCTN18747033 |
| ISRCTN08236707 | ISRCTN98448646 | ISRCTN74259594 | ISRCTN18207278 |
| ISRCTN48408850 | ISRCTN84841116 | ISRCTN01372570 | ISRCTN22866867 |
| ISRCTN92205535 | ISRCTN24323119 | ISRCTN13563102 | ISRCTN68981054 |
| ISRCTN15259166 | ISRCTN11800433 | ISRCTN94083271 | ISRCTN23541842 |
| ISRCTN35577064 | ISRCTN12511434 | ISRCTN15030019 | ISRCTN38009074 |
| ISRCTN13074245 | ISRCTN16470761 |                |                |

ANZCTR (120)

|                     |                     |                     |                     |
|---------------------|---------------------|---------------------|---------------------|
| ACTRN12607000015448 | ACTRN12607000380493 | ACTRN12605000314628 | ACTRN12608000133336 |
| ACTRN12605000766617 | ACTRN12609000101280 | ACTRN12609000288224 | ACTRN12607000105448 |
| ACTRN12607000255482 | ACTRN12608000619347 | ACTRN12609000326291 | ACTRN12609001001280 |
| ACTRN12610000104055 | ACTRN12608000239369 | ACTRN12610000335099 | ACTRN12610000368033 |
| ACTRN12610000631000 | ACTRN12611000096954 | ACTRN12611000113954 | ACTRN12611000288921 |
| ACTRN12609000923268 | ACTRN12609000928213 | ACTRN12612000607875 | ACTRN12610000370000 |
| ACTRN12612000706875 | ACTRN12610000850077 | ACTRN12611000025932 | ACTRN12609000480280 |
| ACTRN12613000211763 | ACTRN12613000351718 | ACTRN12612000209897 | ACTRN12609000652279 |
| ACTRN12613000499785 | ACTRN12612000719831 | ACTRN12613001065785 | ACTRN12612001181897 |
| ACTRN12613001138774 | ACTRN12609000751279 | ACTRN12609000933257 | ACTRN12609000985280 |
| ACTRN12612001280897 | ACTRN12614000281695 | ACTRN12614000493640 | ACTRN12612001307897 |
| ACTRN12613000145707 | ACTRN12615001203549 | ACTRN12613000475741 | ACTRN12610000043033 |
| ACTRN12610000340033 | ACTRN12615000944538 | ACTRN12605000367640 | ACTRN12610000720011 |
| ACTRN12611000149965 | ACTRN12611000226909 | ACTRN12611000552987 | ACTRN12612000032853 |
| ACTRN12612000128897 | ACTRN12605000483651 | ACTRN12606000211561 | ACTRN12612000693820 |
| ACTRN12612000992808 | ACTRN12612001015831 | ACTRN12613000382774 | ACTRN12614000193673 |
| ACTRN12615000534583 | ACTRN12615001114538 | ACTRN12615001152516 | ACTRN12607000499482 |
| ACTRN12608000050358 | ACTRN12608000132347 | ACTRN12608000468325 | ACTRN12608000618358 |
| ACTRN12608000630314 | ACTRN12609000073202 | ACTRN12609000095268 | ACTRN12609000558224 |
| ACTRN12609000676213 | ACTRN12609000698279 | ACTRN12609000989246 | ACTRN12609001012268 |
| ACTRN12609001054202 | ACTRN12610000344099 | ACTRN12610000626066 | ACTRN12610001052022 |
| ACTRN12611000088943 | ACTRN12611000393954 | ACTRN12611000761965 | ACTRN12612000096853 |
| ACTRN12612000705886 | ACTRN12612000896875 | ACTRN12612001285842 | ACTRN12613000229774 |
| ACTRN12614001172695 | ACTRN12615000250538 | ACTRN12615000496516 | ACTRN12616000913471 |
| ACTRN12616001719426 | ACTRN12616001511426 | ACTRN12616001229460 | ACTRN12606000494538 |



|                     |                     |                     |                     |
|---------------------|---------------------|---------------------|---------------------|
| ACTRN12617001628336 | ACTRN12617001522303 | ACTRN12617001247369 | ACTRN12617001211358 |
| ACTRN12617001124325 | ACTRN12617001106325 | ACTRN12617001110370 | ACTRN12617000975392 |
| ACTRN12617000951358 | ACTRN12617000886381 | ACTRN12617000769381 | ACTRN12617000761369 |
| ACTRN12617000666325 | ACTRN12617000496314 | ACTRN12617000355370 | ACTRN12617000351314 |
| ACTRN12617000327381 | ACTRN12617000259347 | ACTRN12617000242325 | ACTRN12617000053325 |

IRCT (175)

|                     |                     |                      |                     |
|---------------------|---------------------|----------------------|---------------------|
| IRCT138707161310N1  | IRCT138902013767N1  | IRCT138905154520N1   | IRCT138904074264N1  |
| IRCT201102011310N6  | IRCT201101133004N4  | IRCT201104104422N2   | IRCT201104254115N2  |
| IRCT201105243217N3  | IRCT201106145864N2  | IRCT201106036699N1   | IRCT201107267117N1  |
| IRCT201108097265N1  | IRCT201110314495N2  | IRCT201112014578N4   | IRCT201203074409N2  |
| IRCT201203159302N1  | IRCT2012082610676N1 | IRCT201210178956N3   | IRCT2012122911912N2 |
| IRCT2012123011944N1 | IRCT2013010111975N1 | IRCT2013012012194N1  | IRCT201302167274N7  |
| IRCT201302277494N3  | IRCT201304098956N4  | IRCT2013072611944N2  | IRCT2013073114238N1 |
| IRCT2013121615814N1 | IRCT201402178588N18 | IRCT2014012513568N3  | IRCT201403039014N29 |
| IRCT2014090417837N1 | IRCT201404146186N3  | IRCT2014110719842N1  | IRCT2015021319508N2 |
| IRCT2015041521758N2 | IRCT2014061717237N3 | IRCT201505236807N17  | IRCT2015070311912N4 |
| IRCT2014121620329N1 | IRCT2015022118754N3 | IRCT2015040921671N1  | IRCT2015061322682N2 |
| IRCT2015062911912N3 | IRCT2015080823554N1 | IRCT2015102724742N1  | IRCT201512057265N3  |
| IRCT138706101061N2  | IRCT138902222891N1  | IRCT138905104450N1   | IRCT201111218151N1  |
| IRCT201201108235N1  | IRCT201202088956N1  | IRCT201205201617N7   | IRCT201206079965N1  |
| IRCT2013041513019N1 | IRCT2013061310657N2 | IRCT2014012216313N1  | IRCT201404191138N11 |
| IRCT2014071717941N3 | IRCT2014103019761N1 | IRCT201509213379N3   | IRCT201509264641N11 |
| IRCT138811163284N1  | IRCT138905114495N1  | IRCT201011275181N4   | IRCT201107026934N1  |
| IRCT201108134519N2  | IRCT201108174242N2  | IRCT201201127117N2   | IRCT2012122811912N1 |
| IRCT201306021310N9  | IRCT2013072611944N3 | IRCT2013091614682N1  | IRCT2014042917484N1 |
| IRCT2015050322060N1 | IRCT201512037265N2  | IRCT201308024655N6   | IRCT2016062728664N1 |
| IRCT201602153217N10 | IRCT2016022126674N1 | IRCT2015102124631N1  | IRCT2016020819995N6 |
| IRCT201204304655N1  | IRCT2015101924605N1 | IRCT2016052528080N1  | IRCT201608228348N35 |
| IRCT201612067529N11 | IRCT2016112531082N1 | IRCT2016110827998N4  | IRCT2016062113768N8 |
| IRCT2016110726674N4 | IRCT2016110330672N1 | IRCT2015091121852N1  | IRCT2016092129908N1 |
| IRCT2016101719316N3 | IRCT2016101830370N1 | IRCT201608228348N35  | IRCT201608228348N35 |
| IRCT201608228348N35 | IRCT201608228348N35 | IRCT201608228348N35  | IRCT201608228348N35 |
| IRCT201608228348N35 | IRCT201608228348N35 | IRCT201608228348N35  | IRCT201608228348N35 |
| IRCT201711058146N28 | IRCT2017040633265N1 | IRCT2017052712438N23 | IRCT2017031233020N1 |
| IRCT2017091236148N1 | IRCT201705079568N17 | IRCT201709199014N187 | IRCT2017091334382N1 |
| IRCT2017083035997N1 | IRCT201706087265N8  | IRCT2017090517756N28 | IRCT201707026918N26 |
| IRCT2016112727779N3 | IRCT2017060434328N1 | IRCT2015101024453N1  | IRCT201611217844N11 |
| IRCT2017012932271N1 | IRCT2017071532303N3 | IRCT201707317844N12  | IRCT2016112615965N9 |
| IRCT2017071135012N1 | IRCT2017073135414N1 | IRCT2017071710599N17 | IRCT201707017265N10 |
| IRCT2017070134830N1 | IRCT2017021632607N1 | IRCT2016121731438N1  | IRCT2016121031328N2 |
| IRCT2017062134641N2 | IRCT201706163220N8  | IRCT2017061634381N2  | IRCT201706107265N9  |
| IRCT2017030531972N2 | IRCT2017060634353N1 | IRCT2017032733154N1  | IRCT2017050833870N1 |
| IRCT2016072129023N1 | IRCT201410278505N13 | IRCT2017053034237N1  | IRCT2017010131710N1 |

|                     |                     |                     |                     |
|---------------------|---------------------|---------------------|---------------------|
| IRCT2016031327036N1 | IRCT2016121031327N1 | IRCT201701242445N4  | IRCT2017030419077N2 |
| IRCT201703287529N13 | IRCT2016120126153N3 | IRCT2016062720282N2 | IRCT201703267529N12 |
| IRCT2016122731612N1 | IRCT2016111030815N1 | IRCT2017021232518N1 | IRCT2016103130607N1 |
| IRCT2017012318945N4 | IRCT2016092824919N2 | IRCT2016072511230N3 | IRCT2015120125320N1 |
| IRCT2017012932283N1 | IRCT2016062728673N1 | IRCT2017011917268N2 | IRCT2016120631255N1 |
| IRCT2017012217268N4 | IRCT2016112931166N1 | IRCT2016110125937N3 | IRCT2016120431234N1 |
| IRCT2016121931475N1 | IRCT201410278505N11 | IRCT2016121931465N1 |                     |

CRiS (129)

|            |            |            |            |
|------------|------------|------------|------------|
| KCT0000684 | KCT0000727 | KCT0000771 | KCT0000817 |
| KCT0000940 | KCT0001356 | KCT0001409 | KCT0001486 |
| KCT0001506 | KCT0001652 | KCT0001653 | KCT0001669 |
| KCT0000071 | KCT0000164 | KCT0000195 | KCT0000385 |
| KCT0000572 | KCT0000818 | KCT0000905 | KCT0000926 |
| KCT0001314 | KCT0001316 | KCT0001348 | KCT0001388 |
| KCT0001411 | KCT0001560 | KCT0001663 | KCT0001673 |
| KCT0001732 | KCT0000153 | KCT0000169 | KCT0000469 |
| KCT0000496 | KCT0000508 | KCT0000628 | KCT0000758 |
| KCT0000918 | KCT0000929 | KCT0000949 | KCT0001122 |
| KCT0001347 | KCT0001358 | KCT0001471 | KCT0001570 |
| KCT0001721 | KCT0000019 | KCT0000106 | KCT0000130 |
| KCT0000168 | KCT0000269 | KCT0000383 | KCT0000495 |
| KCT0000815 | KCT0000854 | KCT0000988 | KCT0001155 |
| KCT0001259 | KCT0001344 | KCT0001357 | KCT0001382 |
| KCT0001422 | KCT0001573 | KCT0001594 | KCT0001768 |
| KCT0001938 | KCT0001939 | KCT0001870 | KCT0001871 |
| KCT0001896 | KCT0001897 | KCT0001782 | KCT0001865 |
| KCT0001899 | KCT0001810 | KCT0001819 | KCT0001864 |
| KCT0001934 | KCT0001944 | KCT0002025 | KCT0001991 |
| KCT0002170 | KCT0002168 | KCT0002164 | KCT0002141 |
| KCT0002139 | KCT0002137 | KCT0002130 | KCT0002117 |
| KCT0002092 | KCT0002091 | KCT0002623 | KCT0002622 |
| KCT0002620 | KCT0002603 | KCT0002602 | KCT0002586 |
| KCT0002563 | KCT0002557 | KCT0002553 | KCT0002508 |
| KCT0002502 | KCT0002498 | KCT0002452 | KCT0002453 |
| KCT0002451 | KCT0002436 | KCT0002438 | KCT0002446 |
| KCT0002414 | KCT0002387 | KCT0002381 | KCT0002374 |
| KCT0002371 | KCT0002330 | KCT0002326 | KCT0002322 |
| KCT0002320 | KCT0002302 | KCT0002299 | KCT0002300 |
| KCT0002295 | KCT0002286 | KCT0002257 | KCT0002258 |
| KCT0002253 | KCT0002249 | KCT0002235 | KCT0002229 |
| KCT0002188 |            |            |            |

## JPRN (89)

|                    |                    |                    |                    |
|--------------------|--------------------|--------------------|--------------------|
| JPRN-C000000277    | JPRN-UMIN000002237 | JPRN-UMIN000002588 | JPRN-UMIN000003954 |
| JPRN-UMIN000006167 | JPRN-UMIN000006881 | JPRN-UMIN000006957 | JPRN-UMIN000012637 |
| JPRN-UMIN000013967 | JPRN-UMIN000015346 | JPRN-UMIN000016625 | JPRN-UMIN000017147 |
| JPRN-UMIN000017983 | JPRN-UMIN000000909 | JPRN-UMIN000000994 | JPRN-UMIN000001441 |
| JPRN-UMIN000002140 | JPRN-UMIN000003115 | JPRN-UMIN000004401 | JPRN-UMIN000005645 |
| JPRN-UMIN000005737 | JPRN-UMIN000007773 | JPRN-UMIN000011349 | JPRN-UMIN000011704 |
| JPRN-UMIN000011757 | JPRN-UMIN000014899 | JPRN-UMIN000015645 | JPRN-UMIN000016171 |
| JPRN-UMIN000017520 | JPRN-UMIN000018925 | JPRN-UMIN000001277 | JPRN-UMIN000001659 |
| JPRN-UMIN000002254 | JPRN-UMIN000004228 | JPRN-UMIN000005332 | JPRN-UMIN000005644 |
| JPRN-UMIN000008934 | JPRN-UMIN000009676 | JPRN-UMIN000010139 | JPRN-UMIN000011692 |
| JPRN-UMIN000012683 | JPRN-UMIN000013695 | JPRN-UMIN000015729 | JPRN-UMIN000017936 |
| JPRN-UMIN000018797 | JPRN-UMIN000005863 | JPRN-UMIN000005899 | JPRN-UMIN000015574 |
| JPRN-UMIN000015920 | JPRN-UMIN000016632 | JPRN-UMIN000017609 | JPRN-UMIN000018815 |
| JPRN-UMIN000018929 | JPRN-UMIN000022259 | JPRN-UMIN000021377 | JPRN-UMIN000021065 |
| JPRN-UMIN000022211 | JPRN-UMIN000023937 | JPRN-UMIN000023856 | JPRN-UMIN000023672 |
| JPRN-UMIN000025309 | JPRN-UMIN000025301 | JPRN-UMIN000025297 | JPRN-UMIN000025226 |
| JPRN-UMIN000024994 | JPRN-UMIN000024092 | JPRN-UMIN000024351 | JPRN-UMIN000024008 |
| JPRN-UMIN000030588 | JPRN-UMIN000030578 | JPRN-UMIN000030273 | JPRN-UMIN000027525 |
| JPRN-UMIN000028737 | JPRN-UMIN000028604 | JPRN-UMIN000028266 | JPRN-UMIN000028218 |
| JPRN-UMIN000028216 | JPRN-UMIN000028222 | JPRN-UMIN000028044 | JPRN-UMIN000028017 |
| JPRN-UMIN000027474 | JPRN-UMIN000026995 | JPRN-UMIN000026141 | JPRN-UMIN000025602 |
| JPRN-UMIN000022018 | JPRN-UMIN000022009 | JPRN-UMIN000025962 | JPRN-UMIN000025691 |
| JPRN-UMIN000025559 |                    |                    |                    |

## DRKS (27)

|              |              |              |              |
|--------------|--------------|--------------|--------------|
| DRKS00004302 | DRKS00004448 | DRKS00005474 | DRKS00005977 |
| DRKS00003767 | DRKS00004857 | DRKS00009803 | DRKS00007491 |
| DRKS00003116 | DRKS00008562 | DRKS00000164 | DRKS00009249 |
| DRKS00010191 | DRKS00010122 | DRKS00010625 | DRKS00006876 |
| DRKS00011281 | DRKS00011079 | DRKS00011038 | DRKS00013160 |
| DRKS00013158 | DRKS00012915 | DRKS00012578 | DRKS00012623 |
| DRKS00012664 | DRKS00012464 | DRKS00011525 |              |

## REBEC (33)

|            |            |            |            |
|------------|------------|------------|------------|
| RBR-3xktv5 | RBR-58yq52 | RBR-6w25zv | RBR-8whr7r |
| RBR-9tcn2x | RBR-4qxt3z | RBR-5g7xqh | RBR-5x69x2 |
| RBR-2t9t7q | RBR-42kz9z | RBR-59f4yr | RBR-3w2p32 |
| RBR-42c8wp | RBR-7cfctd | RBR-4n73hw | RBR-5vrgch |
| RBR-4msydx | RBR-84jx98 | RBR-3dmsbk | RBR-5ndq22 |
| RBR-45zj7b | RBR-69fnqt | RBR-4ndjtp | RBR-5t27sb |
| RBR-9h77k7 | RBR-8f5mny | RBR-53bmfx | RBR-43byv6 |
| RBR-9tk8z  | RBR-4y8vd2 | RBR-77y2sp | RBR-9kwjgx |
| RBR-5q9svp |            |            |            |

## CTRI (12)

|                     |                     |                     |                     |
|---------------------|---------------------|---------------------|---------------------|
| CTRI/2017/12/010901 | CTRI/2017/09/009806 | CTRI/2017/09/009589 | CTRI/2017/08/009541 |
| CTRI/2017/08/009384 | CTRI/2017/08/009346 | CTRI/2017/08/009317 | CTRI/2017/08/009238 |
| CTRI/2017/07/009046 | CTRI/2017/06/008939 | CTRI/2017/06/008782 | CTRI/2017/01/007716 |

## TCTR (16)

|                 |                 |                 |                 |
|-----------------|-----------------|-----------------|-----------------|
| TCTR20131003001 | TCTR20140903004 | TCTR20141111001 | TCTR20150504002 |
| TCTR20131105001 | TCTR20150629002 | TCTR20160609004 | TCTR20160204002 |
| TCTR20171214001 | TCTR20170823002 | TCTR20170822002 | TCTR20170818002 |
| TCTR20170928004 | TCTR20170612002 | TCTR20170508002 | TCTR20170215003 |

## EU-CTR (6)

|                        |                        |                        |                        |
|------------------------|------------------------|------------------------|------------------------|
| EUCTR2006-000947-24-GB | EUCTR2006-000810-18-GB | EUCTR2008-002343-16-IT | EUCTR2015-004250-18-SE |
| EUCTR2013-004657-24-GB | EUCTR2017-000145-40-ES |                        |                        |

## NTR (5)

|         |         |         |         |
|---------|---------|---------|---------|
| NTR1987 | NTR3132 | NTR4059 | NTR4325 |
| NTR4787 |         |         |         |

## PACTR (5)

|                      |                      |                      |                      |
|----------------------|----------------------|----------------------|----------------------|
| PACTR201501000986244 | PACTR201504001033387 | PACTR201711002771340 | PACTR201705002261398 |
| PACTR201701001957330 |                      |                      |                      |

## SLCTR (2)

|                |                |  |  |
|----------------|----------------|--|--|
| SLCTR/2017/039 | SLCTR/2017/029 |  |  |
|----------------|----------------|--|--|

**Text S<sub>3</sub>: Descriptive information of recruitment countries/regions.**

| <b>Countries/Regions</b> | <b>Number of records</b> | <b>Percentage of records (%)</b> |
|--------------------------|--------------------------|----------------------------------|
| <b>China mainland</b>    | <b>1918</b>              | <b>57.44</b>                     |
| <b>United States</b>     | <b>308</b>               | <b>9.22</b>                      |
| <b>Korea</b>             | <b>191</b>               | <b>5.72</b>                      |
| <b>Iran</b>              | <b>181</b>               | <b>5.42</b>                      |
| <b>Japan</b>             | <b>93</b>                | <b>2.79</b>                      |
| <b>Taiwan</b>            | <b>88</b>                | <b>2.64</b>                      |
| <b>Australia</b>         | <b>82</b>                | <b>2.46</b>                      |
| <b>German</b>            | <b>70</b>                | <b>2.10</b>                      |
| <b>Brazil</b>            | <b>67</b>                | <b>2.01</b>                      |
| <b>United Kingdom</b>    | <b>65</b>                | <b>1.95</b>                      |
| <b>Hong Kong</b>         | <b>39</b>                | <b>1.17</b>                      |
| Spain                    | 29                       | 0.87                             |
| Israel                   | 23                       | 0.69                             |
| Canada                   | 19                       | 0.57                             |
| Sweden                   | 15                       | 0.45                             |
| France                   | 13                       | 0.39                             |
| Thailand                 | 13                       | 0.39                             |
| India                    | 13                       | 0.39                             |
| Denmark                  | 11                       | 0.33                             |
| Italy                    | 11                       | 0.33                             |
| Austria                  | 9                        | 0.27                             |
| Norway                   | 9                        | 0.27                             |
| Saudi Arabia             | 8                        | 0.24                             |
| New Zealand              | 8                        | 0.24                             |
| Egypt                    | 7                        | 0.21                             |
| Singapore                | 6                        | 0.18                             |
| The Netherlands          | 6                        | 0.18                             |
| Switzerland              | 5                        | 0.15                             |
| Portugal                 | 5                        | 0.15                             |
| Tunisia                  | 4                        | 0.12                             |
| Mexico                   | 3                        | 0.09                             |
| Ireland                  | 3                        | 0.09                             |
| Belgium                  | 2                        | 0.06                             |
| Turkey                   | 2                        | 0.06                             |

|                |   |      |
|----------------|---|------|
| Nigeria        | 2 | 0.06 |
| Greece         | 1 | 0.03 |
| Uganda         | 1 | 0.03 |
| Malaysia       | 1 | 0.03 |
| Czech Republic | 1 | 0.03 |
| Ecuador        | 1 | 0.03 |
| Bangladesh     | 1 | 0.03 |
| Croatia        | 1 | 0.03 |
| Ukraine        | 1 | 0.03 |
| Poland         | 1 | 0.03 |
| Nepal          | 1 | 0.03 |
| Sri Lanka      | 1 | 0.03 |
